1 **Title: IL-10 driven memory T cell survival and Tfh differentiation promote HIV**  
2 **persistence**

3  
4 \*Susan Pereira Ribeiro<sup>1</sup>, \*Malika Aid<sup>2</sup>, \*Frank P. Dupuy<sup>3</sup>, Chi Ngai Chan<sup>4</sup>, Judd  
5 Hultquist<sup>5,9</sup>, Claire Delage<sup>6</sup>, Eirini Moysi<sup>7</sup>, Deanna Kulpa<sup>8</sup>, Lianghzu Li<sup>1</sup>, Xuan Xu<sup>1</sup>,  
6 Banumathi Tamilselvan<sup>1</sup>, Jeffrey Tomalka<sup>1</sup>, Michael Nekorchuk<sup>4</sup>, Kathleen  
7 Busman-Sahay<sup>4</sup>, Rebeka Bordi<sup>1</sup>, Camille Simoneau<sup>9</sup>, Jean Philippe Goulet<sup>10</sup>,  
8 Vincent Marconi<sup>11,12</sup>, Jean Pierre Routy<sup>13</sup>, Robert Balderas<sup>14</sup>, Luca Micci<sup>15</sup>, Bonnie  
9 Howell<sup>15</sup>, Dan H. Barouch<sup>2</sup>, Nevan Krogan<sup>9,17</sup>, Constantinos Petrovas<sup>7</sup>, Mirko  
10 Paiardini<sup>16</sup>, Steven G Deeks<sup>18</sup>, Jacob D. Estes<sup>4</sup>, Daniel Gorman<sup>15</sup>, Daria Hazuda<sup>15</sup>,  
11 #Rafick Pierre Sekaly<sup>1</sup>

12 \* Authors contributed equally

13 **Affiliations**

- 14 1. Center for System Immunology, Department of Pathology, School of Medicine,  
15 Case Western Reserve University, Cleveland, OH, 44106, USA.
- 16 2. Center for Virology and Vaccine Research, Beth Israel Deaconess Medical  
17 Center, Harvard Medical School, Boston, MA, 02215, USA.
- 18 3. Centre hospitalier de l'Université de Montréal, Montreal, QC, H2X 3E4, Canada
- 19 4. Vaccine and Gene Therapy Institute, Oregon Health and Science University,  
20 Portland, OR, 97006, USA.
- 21 5. Division of Infectious Diseases, Northwestern University Feinberg School of  
22 Medicine, Chicago, IL, 60611, USA.
- 23 6. AIDS and Cancer Virus Program, Frederick National Laboratory for Cancer  
24 Research, Leidos Biomedical Research Inc., Frederick, MD, 21701, USA.
- 25 7. Immunology Laboratory, Vaccine Research Center, NIAID, NIH, Bethesda,  
26 MD, 20814, USA.
- 27 8. Department of Pediatrics, Department of Pathology and Laboratory Medicine,  
28 Emory University School of Medicine, Atlanta, GA, 30322, USA.
- 29 9. Gladstone Institutes, San Francisco, CA, 94158, USA;
- 30 10. Caprion Biosciences Inc., Montreal, QC, H2X 3Y7, Canada;
- 31 11. Division of Infectious Diseases, Emory University School of Medicine. Atlanta,  
32 GA.
- 33 12. Emory Vaccine Center, Rollins School of Public Health, Emory University,  
34 Atlanta, GA. USA., Atlanta VA Medical Center. Decatur, GA, 30322, USA;
- 35 13. Chronic Viral Illness Service, Division of Hematology, McGill University Health  
36 Centre, 1001 Blvd Décarie, Montréal, QC, H4A 3J1, Canada;

- 37 14. Becton Dickinson, San Diego, CA, 92130, USA.  
38 15. Merck & Co., Inc., Kenilworth, NJ, 07033, USA.  
39 16., Inc., Kenilworth, NJ, , USA.  
40 17. Emory Vaccine Center and Yerkes National Primate Research Center,  
41 Department of Pathology and Laboratory Medicine, Emory University, School  
42 of Medicine, Atlanta, GA, 30329, USA.  
43 18. Department of Microbiology, Icahn School of Medicine at Mount Sinai, New  
44 York, NY, 10029, USA;  
45 19. Division of HIV, Infectious Diseases, and Global Medicine, University of  
46 California, San Francisco, San Francisco, CA, USA.

47  
48 #Corresponding Author: Rafick P. Sekaly - [rafick.sekaly@case.edu](mailto:rafick.sekaly@case.edu)

49 Footnote

50 Further information and requests for resources and reagents should be directed to  
51 and will be fulfilled by the Lead Contact, Rafick P. Sekaly ([rafick.sekaly@case.edu](mailto:rafick.sekaly@case.edu))

52

53

54

55

56

57

58

59

60

61

62

63

64

65

## 66 **Summary**

67 Mechanisms regulating HIV persistence are complex and not well understood.  
68 Increased IL-10 levels were positively associated with HIV reservoir in blood and  
69 lymph nodes (LN) of treated HIV aviremic individuals. In LNs, B cells, regulatory T  
70 cells, follicular T helper cells (Tfh), monocytes and macrophages contributed to the  
71 frequencies of IL10+ cells. Cells with HIV DNA in LNs were in close proximity to  
72 IL-10+ cells and/or had the active form of STAT3, the transcription downstream of  
73 IL-10. Gene signatures and proteins associated to cell survival, Co-inhibitory  
74 receptors expression, maintenance of memory T cells, immune metabolism and  
75 Tfh frequencies were all modulated by IL-10 and associated with HIV reservoir  
76 persistence. *In vitro*, STAT3 knockout or neutralization of IL-10, reverted all the  
77 aforementioned pathways and resulted in 10-fold decay in HIV reservoir.  
78 Collectively, these results provide strong evidence for a pivotal role of IL-10 in HIV  
79 persistence, and a potential therapeutic strategy for HIV cure.

80 **Keywords:** HIV-persistence, IL-10, survival, Co-inhibitory receptors, Tfh cells, IL-  
81 10-blockade, STAT3-KO

82

## 83 **Introduction**

84 HIV infection triggers a cascade of cytokine production commonly referred as  
85 cytokine storm(McMichael et al., 2010, Brockman et al., 2009). Sensing of the virus  
86 by PRRs (Pattern recognition receptors)(Jakobsen et al., 2015, Decalf et al., 2017,  
87 Hertoghs et al., 2017) and concomitant early gastrointestinal tract barrier damage  
88 ensuing bacterial translocation boosts generalized inflammation and immune  
89 activation. Importantly, the sensing of bacterial products by TLRs can trigger IL-10

90 production(Zevin et al., 2016), a pleiotropic anti-inflammatory cytokine(Rojas et al.,  
91 2017) that is dramatically increased within weeks of the onset of HIV and SIV  
92 infections(McMichael et al., 2010, Estes et al., 2006). IL-10 is produced by several  
93 innate immune cell subsets (monocytes, macrophages, dendritic cells) and B cells  
94 downstream of the activation of PRRs including TLRs(Kubo and Motomura, 2012).  
95 T regulatory cells (Tregs) and Type I regulatory cells (Tr1) also produce IL-10 upon  
96 TCR engagement(Shive et al., 2015). IL-10 impedes crucial APC functions by  
97 inhibiting cytokine production and preventing the upregulation of Major  
98 Histocompatibility Complex (MHC) and co-stimulatory molecules(Mittal and  
99 Roche, 2015, Rojas et al., 2017). IL-10 also acts directly on T cells by inhibiting  
100 tyrosine phosphorylation downstream of CD28 signaling in T cells(Taylor et al.,  
101 2007), decreasing their proliferation, differentiation, and cytokine production (IL-  
102 2/IFN $\gamma$ ). Several members of the Herpes virus family including CMV, EBV and  
103 others encode for IL-10 analogs and as a result, these viruses evade the immune  
104 response by inducing peripheral tolerance and promote their own survival(Weber-  
105 Nordt et al., 1996) and persist for life in infected hosts(Herbein, 2018, Jochum et  
106 al., 2012, Avdic et al., 2011, Slobedman et al., 2009). Hence in LCMV infection,  
107 production of IL-10 correlates with poor pathogen control(Kahan and Zajac, 2019);  
108 experimental ablation of IL-10 or inhibition of IL-10 signaling restores pathogen  
109 control and reduces the severity of disease(Couper et al., 2008). Furthermore, in  
110 HIV infected individuals, IL-10 is known to inhibit CD4 and CD8 T cell proliferation  
111 and cytokine production *in vitro*; blockade of IL-10 efficiently restored these  
112 functions in both HIV and HCV infected individuals *in vitro* (Brockman et al., 2009,

113 Clerici et al., 1994, Landay et al., 1996, Wilson and Brooks, 2011, Cacciarelli et  
114 al., 1996, Rigopoulou et al., 2005, Yang, 2009).  
115 HIV integrates into the host genome and persists in a small pool of long-lived or  
116 proliferating memory CD4 T cells(Lee and Lichterfeld, 2016, Murray et al., 2016,  
117 Persaud et al., 2000). Low levels of viral transcription/translation and molecular  
118 mechanisms that maintain the survival of productively infected cells facilitate the  
119 persistence of the HIV reservoir in the host(Chomont et al., 2009). Latently infected  
120 cells are known to express high levels of co-inhibitory receptors, such as PD-1,  
121 LAG-3, TIGIT and CTLA4(Fromentin et al., 2016, Chomont et al., 2009, Fromentin  
122 et al., 2019, McGary et al., 2017). Follicular T helper cells (Tfh) in B cell follicles  
123 also contribute to the formation and maintenance of the HIV reservoir, as they  
124 harbor quantitatively more intact provirus(Perreau et al., 2013) than non-Tfh cells.  
125 Of note, B cells which produce IL-10 are dependent on IL-10 for their own  
126 survival(McGary et al., 2017), and are critical for the maintenance of Tfh  
127 frequencies(Kerfoot et al., 2011). *Little is known about the role that IL-10 plays in*  
128 *the establishment and the maintenance of HIV reservoir size. Herein, we used*  
129 *unbiased holistic approaches, including tissue in situ, ex vivo, and in vitro*  
130 *experimental methodologies to identify and mechanistically interrogate the*  
131 *interplay between IL-10 and HIV persistence in infected patients.*

132

## 133 **RESULTS**

134 **Significantly increased levels of circulating IL-10 in treated HIV infected**  
135 **individuals (aviremics) is associated with the size of latent HIV reservoir.** In

136 plasma from antiretroviral (ART) treated HIV aviremic individuals (n=24) and HIV  
137 negative healthy controls (HC, n=4) (subgroup representative of a larger cohort,  
138 **Table S1**), 23 cytokines (IFN-2a, IFN-b, IFN-g, IL-10, IL-15, IL-17A, IL-18, IL-1b,  
139 IL-2, IL-21, IL-22, IL-27, IL-29, IL-33, IL-4, IL-6, IL-7, IL-8, IL-9, TNF-a, TGF-b1,  
140 TGF-b2 and TGF-b3) were evaluated using the Meso-Scale platform (MSD). IL-10  
141 was the only cytokine with significantly higher levels in HIV aviremic individuals  
142 when compared to HIV negative healthy individuals [Median HIV-avireemics: 455  
143 fg/mL, fold change (FC) HIV/HC: 1.4,  $p < 0.05$ ] (**Fig S1a and Fig 1a**) that was also  
144 positively correlated with the frequencies of circulating latently infected cells as  
145 measured by HIV integrated DNA (HIV IntDNA), a well-accepted readout for HIV  
146 reservoir(Eriksson et al., 2013) (Median HIV-avireemics:  $\log 2.85 \text{ cps}/10^6 \text{ CD4 T}$   
147 cells,  $p < 0.05/r = 0.44$  – **Fig S1b and Fig 1b**). None of the other cytokines known to  
148 trigger the transcription factor (TF) STAT3(Donnelly et al., 1999), such as IL-9, IL-  
149 6, IL-21, IL-22, IL-27(Demoulin et al., 1996, Hillmer et al., 2016), were increased  
150 or associated with HIV IntDNA in this cohort (**Fig S1a and b**, respectively). The  
151 potential role of IL-10 in the persistence of HIV was further supported by the  
152 heightened per cell expression of the IL-10 receptor (judged by Mean  
153 Fluorescence Intensity - MFI) in different memory CD4 T cell subsets from HIV  
154 aviremic as compared to HIV negative healthy individuals (Median MFI IL-10Ra  
155 Total CD4 HIV-avireemics: 6167, FC HIV/HC: 1.2,  $p = 0.003$  - **Fig. S1c**) as measured  
156 by flow cytometry. The per cell level of IL10Ra expression in CD45RA+ cells (a  
157 cell subset that includes T stem cell memory (TSCM), a target for HIV  
158 infection(Chahroudi et al., 2015)), was also positively associated with HIV IntDNA

159 reservoir ( $p < 0.03$ /  $r = 0.37$  - Pearson Correlation - **Fig. S1d**). It is important to  
160 highlight that no other clinical parameter was associated with HIV reservoir in this  
161 study (time of HIV infection: median: 7.5 years –  $p = 0.70$ ,  $r = -0.07$ ; age: median:  
162 50.5 years old -  $p = 0.75$ ,  $r = -0.06$ ; time under ART: median: 3 years -  $p = 0.34$ ,  $r = -$   
163 0.16; CD4 nadir: median 251 cells/mL -  $p = 0.31$ ,  $r = -0.17$ ; CD4 counts: median 446  
164 cells/mL -  $p = 0.25$ ,  $r = -0.20$ , CD8 counts: median 662 cells/mL -  $p = 0.72$ ,  $r = 0.06$ ;  
165 CD4/CD8 ratio: median: 0.58 -  $p = 0.17$ ,  $r = -0.24$ ; sCD14: median: 1662 ng/mL -  $p =$   
166 0.26,  $r = 0.19$  – data not shown). *Our data indicate that IL-10 may play a significant*  
167 *role for HIV persistence in ART HIV individuals.*

168

169 **Significantly higher HIV DNA+ cells in lymph nodes from HIV aviremic**  
170 **individuals are associated with close proximity to IL-10+ cells.** We next used  
171 several *in situ* quantitative imaging approaches to evaluate the contribution of IL-  
172 10 to the cellular and anatomical localization of the HIV reservoir in lymph nodes  
173 (LNs). In LNs from HIV negative HC (left plots,  $n=7$ ) and HIV-aviremics (right plots,  
174  $n=13$ ), *in situ* immuno-histochemistry (**Fig 1c**) revealed that the frequencies of IL-  
175 10+ cells per anatomical area, *i.e* the Follicle (F), T cell zone (TZ) and medullary  
176 cord (MC) were significantly increased in HIV aviremic individuals when compared  
177 to HC (F: HIV aviremics: 0.27% IL-10+ cells, FC HIV/HC: 9,  $p < 0.0001$ , TZ: HIV  
178 aviremics: 0.46% IL-10+ cells, FC HIV/HC: 9.8,  $p < 0.0001$ ; MC: HIV aviremics:  
179 1.6% IL-10+ cells, FC HIV/HC: 6.4,  $p = 0.0003$  – **Fig. 1d** – Mann-Whitney unpaired  
180 T test). The contribution of the IL-10 pathway engagement in the maintenance of  
181 the HIV reservoir in follicular (F) and extra-follicular (EF) areas of LNs was further

182 evidenced by the proximity of IL-10+ cells to HIV vDNA+ cells, as well as the  
183 proportion of vDNA+ cells that expressed phosphorylated STAT3+ (pSTAT3) cells.  
184 DNAscope (vDNA: red), followed by pSTAT3 (green), IL-10 (cyan), CD20 (pink)  
185 multiplexed immunofluorescence staining was performed. Representative images  
186 from 2 donors show the expression of the selected markers in the follicle (top panel  
187 – donor 1) and in the extra-follicular area (bottom panel – donor 2) (**Fig 1e**). While  
188 the overall frequency of pSTAT3+ cells was on average 11.3% (SEM  $\pm$ 1.8) in all  
189 LN compartments [8.8% (SEM  $\pm$ 1.3; F), 10.6% (SEM  $\pm$ 1.7; EF) and 14.5% (SEM  
190  $\pm$ 2.1; MC)], the frequency of HIV vDNA+ cells that were pSTAT3+ was on average  
191 30.1% (SEM  $\pm$ 5.1) in the LNs of HIV aviremic individuals (n=18) (average  
192 quantification from all images as in **Fig 1e** for all donors evaluated). *Importantly,*  
193 *the frequencies of HIV vDNA+ cells increased significantly with their proximity to*  
194 *IL-10+ cells (0-15uM Median: 60% HIV vDNA+, 15-25uM Median: 25% HIV*  
195 *vDNA+, 35uM Median: 13% HIV vDNA+ cells; 0-15um vs 15-25uM p>0.05; 15-*  
196 *25uM vs 35uM p<0.05, 0-15um vs 35uM p<0.01 – Fig 1f) as measured by HALO*  
197 *(Spatial Analysis plot - detailed in methodology). Importantly, 92.6% of all HIV*  
198 *vDNA+ cells were within an average distance of ~3-5 cell diameters (35um) from*  
199 *an IL-10+ cell (quantification from Fig 1e - n=18 donors). Our results capture a*  
200 *static snapshot of the LN structure; hence these findings most likely represent an*  
201 *underestimation of the number of infected or IL-10+ cells, as cells in lymph nodes*  
202 *are in constant movement(Huang et al., 2004, Bajenoff et al., 2007, Germain et*  
203 *al., 2012). Nevertheless, these data strongly and significantly infer the importance*  
204 *of IL-10 signaling in HIV persistence in LNs.*



205

206 **Several lymphoid and non-lymphoid cell subsets contribute to IL-10**

207 **production in LNs of treated chronic aviremic HIV-infected individuals.** Using

208 multiparametric confocal imaging and histo-cytometry (Gerner et al., 2012) we

209 demonstrate that several cell subsets including monocytes and macrophages (**Fig**

210 **S2a and Fig 2a**) as well as CD4 T cell subsets and B cells (**Fig S2b and Fig 2b**)

211 contributed to IL-10 production in the F and EF areas of LNs. A representative

212 position map is shown in **Fig 2c**. The EF zone presented higher frequencies of IL-

213 10hi cells than F zone (Images in **Fig 2a-b** – IL-10 red dots, quantification in **Fig**

214 **2d**-  $p < 0.05$ , FC EF/F: 4.05,  $n=5$ ). Considering the relative frequencies of IL10hi

215 cells in the F and EF areas in our cohort, IL-10 expressing cells included

216 CD163+/CD68, CD163-/CD68+ and CD163+/CD68+ monocyte/macrophage; the

217 latter cell subset contributed to significant higher frequencies of IL-10 + cells in the

218 EF area than in Follicles ( $p < 0.0001$ , 1.74-FC increase into EF compared to

219 *follicular area*- **Fig 2a and e**,  $n=5$ , gating strategy **Fig S2a**). Although most of IL-

220 10+CD4 T cells were FoxP3-, a readily fraction was found to be FoxP3+ in the F

221 and EF areas (*Foxp3+*: FC EF/F: 5.72,  $p=0.59$ ; *Foxp3-*: FC EF/F: 1.37,  $p=0.45$

222 (**Fig 2b, e**,  $n=4$ , gating strategy **Fig S2b**). In the B cell follicle (BCF), regular

223 immunohistochemistry (IHC) multiplexing markers for B cells (CD20: blue), CD4

224 cells (red), PD-1 (orange) and IL-10 (green), we observed that Tfh cells (CD4+

225 PD1+(white circles, **Fig 2f**), contributed to 42% of the IL10+ cells in the BCF (**Fig**

226 **1g**,  $n=11$ ). Thus, several LN cell subsets can contribute to IL-10 production and

227 could impact on HIV reservoir persistence in this relevant compartment in vivo.

228

229 **Pathways associated with cell survival, T cell memory maintenance, co-**  
230 **inhibitory receptors expression, metabolism and Tfh cell differentiation are**  
231 **positively associated with pIL-10 levels and HIV IntDNA.** Transcriptional  
232 profiling was used to identify the mechanisms downstream of IL-10 that underlie  
233 its association with HIV persistence. Gene expression profiles of whole blood from  
234 HIV-aviremic individuals were correlated by linear regression analysis with the  
235 frequencies of cells harboring HIV IntDNA and to pIL-10 levels (**Fig 3a**, n=22).  
236 Gene Set Enrichment Analysis (GSEA)(Subramanian et al., 2005) showed that  
237 pathways downstream of IL-10/STAT3 signaling were positively correlated to pIL-  
238 10 (NES: 2.16, FDR<10<sup>-6</sup>, p<10<sup>-6</sup>) and HIV IntDNA levels (NES1.79, FDR<10<sup>-6</sup>,  
239 p<10<sup>-6</sup>) (**Fig 3b**; Leading edge genes - LEGs, **Fig S3a**). Additionally, correlated  
240 pathways and genes encoded for molecules with anti-apoptotic properties which  
241 are all targets of the JAK-STAT signaling pathway (BIRC5 FYN, BCL2L1, NOTCH,  
242 MYC; pIL-10 NES: 1.9, FDR<10<sup>-6</sup>, p<10<sup>-6</sup>; HIV IntDNA NES: 1.88, FDR<10<sup>-6</sup>,  
243 p<10<sup>-6</sup>), as well genes endowed with antiapoptotic functions (BCL2L1, PIM1) or  
244 that act as regulators of cell metabolism (MYC, JUN)(Wang et al., 2011), genes  
245 related to glycolysis and glucose catabolic process (STIP1, ENO1, GAPDH - pIL-  
246 10 NES: 2.15, FDR<10<sup>-6</sup>, p<10<sup>-6</sup>; HIV IntDNA NES: 1.99, FDR<10<sup>-6</sup>, p<10<sup>-6</sup>),  
247 genes associated to the maintenance of Central Memory T cells, the long-term  
248 reservoir (TCM) (CXCR3, EHD4, TOP2A, TNFRSF4 - pIL-10 NES: 3.44, FDR<10-  
249 6, p<10<sup>-6</sup>; HIV IntDNA NES: 2.37, FDR<10<sup>-6</sup>, p<10<sup>-6</sup>), genes encoding for co-  
250 inhibitory-receptors (LAG3, TIGIT, PDCD1, CTLA4; pIL-10 NES: 2.04, FDR<10<sup>-6</sup>,

251 p<10<sup>-6</sup>; HIV IntDNA NES: 2.03, FDR<10<sup>-6</sup>, p<10<sup>-6</sup>) and their downstream  
252 signaling targets (PIM3, CASP3, PRMT1, NFKBIZ, KAT2A), as well as genes that  
253 define Tfh differentiation (BCL6, MAF, CXCR5, ICOS-ICOSL pIL-10 NES: 1.7,  
254 FDR<10<sup>-6</sup>, p<10<sup>-6</sup>; HIV IntDNA NES: 1.39, FDR= 0.005, p<10<sup>-6</sup>) (**Fig 3b** –  
255 pathways; and **Fig S3a** – LEGs) were all associated to pIL10 and HIV IntDNA  
256 levels (**Table S2 -3**). *These results highlight the contribution of several biological*  
257 *processes (cell survival, induction of Co-IR, cell, memory maintenance,*  
258 *metabolism and Tfh differentiation), importantly STAT3/IL-10 signaling, as*  
259 *associated to ex vivo plasma levels of IL-10, as potential drivers of HIV reservoir*  
260 *persistence.*

261

262 **IL-10 stimulation in vitro triggers the upregulation of the pathways**  
263 **associated with heightened pIL-10 levels and to the magnitude of the HIV**  
264 **reservoir ex vivo.** To confirm the specific role of IL-10 in the induction of the  
265 aforementioned pathways associated with HIV reservoir persistence *in vivo*, gene  
266 array analysis followed by GSEA was performed on *in vitro* IL-10 stimulated CD4+  
267 T cells from healthy donors. IL-10 induced pathways (**Fig 3c**) and LEGs (**Fig 3d**)  
268 (**Table S4**) were the same as the ones significantly correlated to *ex vivo* levels of  
269 pIL-10 and HIV IntDNA. They included the IL-10-transcription factor STAT3, its  
270 target genes as well as genes downstream of IL-10 signaling pathway (PDCD1,  
271 SOCS3, BCL3, MYC, IFITM1, BCL6 ,JUN, SOD2, STAT3) (NES: 2.72, FDR<10-  
272 6, p<10<sup>-6</sup>), genes encoding for survival and anti-apoptotic pathways (PIM1,  
273 NOTCH, MYC, BCL2L - NES: 1.99 FDR<10<sup>-6</sup>, p<10<sup>-6</sup>), maintenance of T cell

274 memory ( PIK3CA, IL7R, KLRB1, BTG1 - NES: 1.62 FDR=  $6 \times 10^{-4}$  p= 0.005), PD1  
275 signaling pathway and exhaustion (PDCD1, CTLA-4, CASP3, BTF3, KAT2A),  
276 (PRDX4, ELMO1, IRF4) - NES: 1.69 FDR= $5 \times 10^{-4}$ ,  $p < 10^{-6}$ ), maintenance of cell  
277 metabolism (ALDOA, ENO1, PKM2, LDHA, SGK1, GAPDH, PRDX1 - NES: 1.93  
278 FDR= $3.3 \times 10^{-4}$ ,  $p < 10^{-6}$ ), and Tfh signaling (BATF, BCL6, ICOS, - NES: 2.31  
279 FDR $< 10^{-6}$ ,  $p < 10^{-6}$ ). Importantly, we found that 453 out of 644 IL-10 induced  
280 genes that correlated with the frequencies of cells with HIV IntDNA were also  
281 transcriptionally regulated by STAT3, *which highlights the restrict regulation of*  
282 *these pathways by IL10/STAT3 signaling.* These STAT3 target genes (ref:  
283 (<http://www.beaconlab.it/> pscan) also covered all the aforementioned pathways  
284 listed as associated with pIL-10 and HIV IntDNA *in vivo* (**Fig S3b and c**,  
285 respectively – NES and FDR indicated in the figure).

286

287 **Soluble CD14 (sCD14) is increased in HIV infected individuals and is**  
288 **associated with heightened pIL-10 levels and major pathways associated**  
289 **with HIV persistence in vivo.** Bacterial translocation occurs early upon HIV  
290 infection (Marchetti et al., 2013) as a consequence of the loss of Th17 cells in the  
291 gut (Bixler and Mattapallil, 2013). sCD14 is a validated biomarker for bacterial  
292 translocation (Kelesidis et al., 2012) as it is released from activated monocytes  
293 upon engagement to lipopolysaccharide (LPS). The engagement of bacterial  
294 Pattern recognition receptor (PRRs) to Pathogen-associated molecular pattern  
295 (PAMPs) is known to trigger IL-10 production (Yanagawa and Onoe, 2007). Indeed,  
296 in our HIV cohort of HIV-aviremic individuals, the plasma levels of sCD14 were

297 significantly increased when compared to HIV negative HCs (HC, n=10, HIV, n=42  
298 - FC HIV/HC: 1.20,  $p < 0.05$  – **Fig S4a**) and were significantly associated with pIL-  
299 10 levels ( $p = 0.007/r = 0.53$  – **Fig S4b**) indicating that sCD14 could constitute one  
300 of the upstream signals leading to heightened pIL-10 levels in these individuals.  
301 Supporting this hypothesis, all the pathways associated with heightened pIL-10  
302 and HIV reservoir *in vivo*, were also significantly associated with sCD14 levels (IL-  
303 10/STAT3 signaling (OASL, IL-10RA, IL4, JAK2 - NES: 2.34,  $FDR < 10^{-6}$ ,  $p < 10^{-6}$ ),  
304 survival and anti-apoptosis (TNFR1B, MYD88, GAPD4 - NES: 2.05,  $FDR < 10^{-6}$ ,  
305  $p < 10^{-6}$ ), maintenance of memory T cells (IL10Ra, TIGIT, TNFRb, SMAD3 - NES:  
306 3.49,  $FDR < 10^{-6}$ ,  $p < 10^{-6}$ ), inhibitory molecules signaling (CTLA4, TIGIT, FYN,  
307 BHLHE40 - NES: 2.29,  $FDR < 10^{-6}$ ,  $p < 10^{-6}$ ), maintenance of cell metabolism  
308 (ENO1, GAPDH, SLC7A5 - NES: 2.54,  $FDR < 10^{-6}$ ,  $p < 10^{-6}$ ), and Tfh signaling  
309 (CXCR5, CD2, PRDM1 - NES: 1.93  $FDR < 10^{-6}$ ,  $p < 10^{-6}$ ) (Pathways and LEGs -  
310 **Fig S4c-d** respectively, **Table S5**). Of note, several transcription factors (TFs)  
311 known to bind directly or indirectly to the IL-10 gene promoter (Kubo and Motomura,  
312 2012, Zhang and Kuchroo, 2019, Tsuji-Takayama et al., 2008, Cao et al., 2005)  
313 including STAT3, BCL-6, MAF, MYC were among the top genes that contributed  
314 to the enrichment of these pathways and were significantly associated with sCD14  
315 and pIL-10 levels (**Fig S4e**). Overall, 20 pathways were commonly associated with  
316 HIV IntDNA, pIL-10, sCD14 and specifically induced by IL-10 stimulation *in vitro*  
317 (**Fig S4f, Table S6**). These pathways included all the aforementioned biological  
318 processes (survival, co-IR, cell memory, metabolism and Tfh differentiation).  
319 *These data indicate that sCD14 could be one of the mechanisms upstream of IL-*

320 *IL-10 production in HIV-aviremic individuals, contributing to the modulation of*  
321 *pathways associated with HIV persistence.*

322

323 **STAT3 knockout (KO) leads to decreased viral reservoir.** To validate  
324 experimentally the mechanisms identified by transcriptional profiling associated  
325 with HIV persistence and specific to IL-10 signaling we used an *in vitro* model of  
326 HIV infection and latency (LARA: Latency and Reversion Assay(Kulpa et al.,  
327 2019)) (**Fig S5a**). In this assay, isolated memory CD4<sup>+</sup> T cells from healthy  
328 individuals are infected *in vitro* and induced to latency by adding TGFb which our  
329 group previously established as an inducer of HIV latency *in vitro*(Kulpa et al.,  
330 2019). To confirm the role of IL-10 in the induction of latency, we initially compared  
331 it to TGFb. As readout we have evaluated HIV protein expression (p24 – HIV gag)  
332 by flow cytometry (**Fig S6a, Table S7**) at different time-points. Addition of IL-10  
333 after *in vitro* infection led to a significantly faster HIV p24 protein expression decay  
334 when compared to TGFb [Day 12, Fold Decay (FD) (FD IL-10/TGFb):2.21, p<0.05,  
335 Day 15, FD1.54, p<0.05, Day 17, FD2.85, p<0.05 - **Fig 4a**]. *Importantly,*  
336 *frequencies of cells with latent HIV provirus, as measured by HIV IntDNA (n=5),*  
337 *were comparable between the two tested conditions (p>0.05 - **Fig 4b**), validating*  
338 *IL-10 as an inducer of latency.*

339 The importance of the IL-10/IL-10Ra-STAT3 axis for the maintenance of HIV (p24)  
340 and for the expression of major proteins of each of the pathways associated with  
341 HIV IntDNA *ex vivo* that were as well specifically induced by IL-10 *in vitro*, was  
342 validated by the blockade of the IL-10 pathway. For this purpose, we either

343 knocked-out STAT3 by CRISPR-CAS9 editing (STAT3 KO)(Hultquist et al., 2019)  
344 or neutralized IL-10 by using an anti-IL-10 monoclonal antibody (mAb)(L., 2005).  
345 Addition of anti-IL-10 mAb led to a significant decrease in the phosphorylation of  
346 STAT3 even at concentrations as low as 0.1ug/mL ( $p < 0.05$  - **Fig S5b**). Efficiency  
347 of STAT3 knock-out was validated in aCD3/CD28 pre-activated CD4 T cells. The  
348 transfection of pre-activated cells led to significant knockout of STAT3 protein  
349 detection with all five STAT3 guide RNAs tested (**Fig S5c**). In the LARA model,  
350 resting cells are required. Resting memory CD4 T cells were transfected with the  
351 combination of two STAT3 guides (guides 3+4) before HIV infection. Non-targeted  
352 (NT) guide RNA was used as control. The transfection protocol in resting cells  
353 resulted in lower but significant decreased frequencies of STAT3+ cells as  
354 measured by flow cytometry (5% full knock-out when compared to the NT guide -  
355  $p < 0.05$ ,  $n=5$  – **Fig S5d**). Additionally, STAT3KO induced on average a decay of  
356 27% at per cell level expression of STAT3 (median fluorescence intensity: MFI –  
357 range STAT3KO [MFI 349-486]; range NT [MFI 421-695],  $p < 0.05$  – **Fig S5e**). In  
358 line with the gene expression results, STAT3 KO show heightened frequencies of  
359 dead cells as a consequence of the removal of survival signals downstream of this  
360 transcription factor (**Fig S5f**,  $p < 0.0001$ , Median STAT3hi/dead cells: 34.1%,  
361 Median STAT3lo/dead cells: 87.4%) (Left: counter plot gated on STAT3hi x  
362 STAT3lo, followed by histogram showing the viability staining in both populations).  
363 Knocking out STAT3 prior to infection did not impact the infection rates of these  
364 cells with HIV when compared to non-transfected cells or transfected NT (ns: non-  
365 significant - **Fig S5g**,  $n=5$ ). The presence of STAT3hi and STAT3lo cells in resting

366 STAT3-targeted samples allowed us to assess the role of STAT3 in HIV  
367 maintenance, and the expression of major proteins of each pathway in the same  
368 sample by using a flow-cytometry STAT3 antibody. Gating strategy used for the  
369 downstream analysis is shown in **Fig S6 b-d**.

370 STAT3 knockout led to a 10-fold decay in HIV reservoir, quantified by HIV IntDNA  
371 per million CD4 T cells, as compared to NT cells after (FC NT/STAT3KO = 3.0,  
372  $p < 0.01$  -**Fig 4c** – evaluation performed 14 days after transfection, 11 days after  
373 HIV infection and culture in IL-10 supplemented media). Importantly, cultures of  
374 NT transfected cells presented similar levels of HIV IntDNA as non-transfected  
375 cultures as both experimental conditions were kept in IL-10 containing media as  
376 well ( $p > 0.05$ , **Fig 4c**). *These results confirm the role of IL-10 in inducing latency*  
377 *and HIV persistence.*

378

379 **STAT3KO and IL-10 blockade lead to decreased expression of major proteins**  
380 **of key pathways associated with HIV persistence in vivo.** Next, we used flow  
381 cytometry to validate the expression of representative proteins from each of the  
382 pathways associated with pIL-10 and HIV reservoir levels *ex vivo* (survival,  
383 memory maintenance, Co-inhibitory receptors (Co-IR), metabolism and Tfh cells)  
384 in cells from LARA. These experiments were performed after 11 days of culture in  
385 IL-10 containing media in transfected and non-transfected cells. The data analysis  
386 was performed in an unbiased way using t-distributed stochastic neighbor  
387 embedding (TSNE) or Uniform Manifold Approximation and Projection for  
388 Dimension Reduction (UMAP). Briefly, a comparable number of events from each



389 sample was exported and clustered based on the MFI of each marker of interest.  
390 Additionally, frequency of cells expressing each marker were quantified. The  
391 expression of each marker is provided in both TSNE and UMAP plots (**Fig 4 d** and  
392 **g**, respectively) and in heatmaps (**Fig 4 e, f** and **h**). In the STAT3KO-targeted  
393 cultures, the STAT3hi cells presented significantly increased expression of BCL2  
394 at per cell level (FC hi/lo: 2.48 –  $p < 0.001$ ), increased expression of markers  
395 specific to TCM [CCR7 (FC hi/lo: 1.12 –  $p = 0.06$ ) and CD27 (FC hi/lo: 1.36 –  
396  $p < 0.05$ )] (**Fig 4e**) and higher TCM / TEM ratios (**Fig S7a** – right counter plot shows  
397 TCM x TEM in STAT3hi (red) and STAT3 lo (blue) cells); higher per cell level  
398 expression of the Co-IR PD1 (PD1- FC hi/lo: 1.19 –  $p < 0.05$ - **Fig 4e**) and a trend to  
399 increased PD1+ cells frequencies (**Fig S7b**) when compared to STAT3lo cells.  
400 Importantly, STA3hi cells contributed significantly to the persistence of HIV+ cells  
401 (p24- FC hi/lo: 1.26 –  $p = 0.02$ - **Fig 4e**). *STAT3lo cells (BCL2lo CCR7lo CD27lo*  
402 *PD1lo) presented a significant decrease in the expression of p24, supporting the*  
403 *importance of the survival signal, along with the maintenance of the TCM status*  
404 *and the expression of Co-IRs for HIV persistence.*  
405 We used an independent approach (neutralizing anti-IL-10 mAb) to verify the  
406 impact of IL-10 on the modulation of the expression of the key proteins measured  
407 above. Non-transfected CD4 T cells were infected and treated with IL-10 [10ng/mL]  
408 with or without anti-IL-10 [10ug/ml] for 11 days; expression of BCL2, memory  
409 markers, PD1 and HIV protein was measured by flow cytometry. The potential of  
410 the anti-IL-10 mAb in blocking IL-10 signaling was shown (**Fig S5b**). A significant  
411 decrease in BCL2 expression at per cell level was observed in cell cultures treated

412 with aIL-10, while control cell cultures that received only IL-10 showed increases  
413 in BLC2 expression (FC IL-10/aIL-10 1.50,  $p < 0.05$  – **Fig 4f**), confirming the  
414 transcriptional profiling results (**Fig 3 b-c**). Addition of IL-10 to cell cultures led to  
415 an increase in the expression of markers of TCM cells [CCR7 (FC IL-10/aIL-10:  
416 1.99 –  $p = 0.08$ ) and CD27 (IL-10/aIL-10: 2.03 –  $p = 0.004$ ) - **Fig 4f**], as well as an  
417 increase in the frequencies of this subset when compared to TEM cells (**Fig S7c**).  
418 The per cell expression levels of PD1 were also significantly increased by IL-10  
419 (FC IL-10/aIL-10 1.61  $p < 0.05$  – **Fig 4f**) as well as its frequencies (FC IL-10/aIL-10:  
420 3.54,  $p < 0.01$  – **Fig S7d**). Addition of anti-IL-10 decreased the frequencies of PD1+  
421 cells to levels similar to unstimulated cells. Interestingly, our results are also  
422 consistent with published results in cancer pre-clinical models (Turnis et al., 2015,  
423 Sawant et al., 2019), where IL-10 levels were associated with heightened Co-IR  
424 expression. These results validate at protein levels the gene expression profiling  
425 (**Fig 3 b-c**) observed *ex vivo* and specifically induced by IL-10 *in vitro*.  
426 We next monitored the impact of IL-10 signaling on cell metabolism and HIV  
427 persistence as suggested by the transcriptional profiling results. IL-10Ra+ cells  
428 presented significantly higher levels of glycolysis as monitored by the higher  
429 expression of the glucose importer (Glut-1) (FC IL-10Rp/IL-10Rn: 7.00,  $p < 0.0001$   
430 - **Fig 4g-h, Fig S6d**) additional to higher frequencies of cells expressing Glut-1 (FC  
431 IL-10Rp/IL-10Rn 2.79,  $p < 0.05$  – **Fig S7e**). These Glut-1+ cells were significantly  
432 enriched in expression of the HIV-envelope (Env) when compared to cells lacking  
433 the engagement to the IL-10 pathway (IL-10Ralo cells) (Env MFI FC IL-10Rp/IL-  
434 10Rn: 1.25,  $p = 0.02$  - **Fig 4g-h**). *Collectively, these results validate the ability of IL-*

435 *10 to regulate the expression of key proteins of the major pathways associated*  
436 *with HIV persistence in vivo. STAT3 KO or neutralization of IL-10 led to decreased*  
437 *expression of the survival protein BCL2, differentiation towards TEM accompanied*  
438 *by downmodulation of PD-1 and decay of immune metabolism resulting in*  
439 *decreased HIV+ cells.*

440

441 **IL-10 leads to Tfh differentiation, a major HIV reservoir compartment.** Tfh cells  
442 are postulated to be the HIV sanctuary in lymph nodes(Fukazawa et al., 2015, Aid  
443 et al., 2018). Accordingly, a gene expression signature specific to Tfh cells were  
444 found as positive correlate of HIV reservoir in our human cohort and were  
445 specifically induced by IL-10 stimulation *in vitro* (**Fig. 3b-c**, respectively). Target  
446 genes common to IL-10/STAT3/Bcl6/c-Maf included the major pathways  
447 associated with HIV reservoir *in vivo* (survival, Co-IR and Tfh – **Fig 5a**). Of note,  
448 24 hours stimulation of purified CD4 T cells from healthy donors with IL-10,  
449 triggered the expression of surface markers and transcription factors known to be  
450 features of Tfh cells (CXCR5, PD1, BCL6 and c-MAF)(Crotty, 2014) (FC IL-10/NS:  
451 3.69,  $p < 0.001$ - **Fig 5b** - Gating strategy **Fig S8a-c**). Addition of anti-IL-10  
452 abrogated the IL-10 induced upregulation of these markers to similar levels of  
453 those of unstimulated cells. Interestingly, in another experiment using whole  
454 PBMCs and an unbiased UMAP analysis, IL-10 stimulated cells that presented a  
455 Tfh profile (STAT3<sup>hi</sup>, c-Maf<sup>hi</sup>, BCL6<sup>+</sup>) were also IL21<sup>+</sup> (FC IL-10/aIL-10: 2.07,  
456  $p < 0.01$  – **Fig 5c** -including inset). IL21 exerts an autocrine impact on Tfh  
457 differentiation and helps the formation of the germinal center reaction by triggering

458 B cell proliferation and differentiation(Silver and Hunter, 2008). Importantly, in  
459 LARA (non-transfected conditions), cells expressing BCL6 were significantly  
460 preferentially infected when compared to their BCL6- counterpart (FC  
461 BCL6+/BCL6-: 159.1,  $p < 0.05$  - **Fig 5d** – representative counter plot on top show  
462 BCL6 vs HIV-p24) mimicking numerous observations showing Tfh as a foyer for  
463 HIV persistence(Thacker et al., 2009, Godinho-Santos et al., 2020, Cai et al.,  
464 2019). In chronically treated HIV-infected individuals, Tfh cells become a reservoir  
465 sanctuary in the BCF (F), being enriched in HIV IntDNA (**Fig 5e**). *These results*  
466 *show that IL-10 by inducing Tfh differentiation in BCF could provide an important*  
467 *source of targets for HIV infection and viral persistence.*

468

## 469 **DISCUSSION**

470 Persistent latent infection requires that HIV infected cells endure over time. Herein,  
471 we identified (*in vivo*) and validated (*in vitro*) our hypothesis that IL-10 plays critical  
472 role for the maintenance of the HIV reservoir. We have demonstrated that IL-10  
473 enhances i) cell survival, ii) upregulates the expression of the co-inhibitory receptor  
474 PD-1 (several Co-IRs are part of the gene signature, such as Lag3, TIGIT, CTLA4),  
475 which have been previously shown to be involved in the establishment of HIV  
476 latency and immune dysfunction(Trautmann et al., 2006, Tzeng et al., 2012, Peng  
477 et al., 2008); iii) prevents the differentiation of quiescent TCM to the TEM subset,  
478 which we have shown earlier to favor HIV replication(Wonderlich et al., 2019); iv)  
479 triggers a *bona fide* metabolic status associated with long lasting cells; and finally,  
480 v) we have shown that IL-10 is a potent regulator of Tfh differentiation. *The role of*  
481 *IL-10 in HIV persistence is supported by our findings where knocking out STAT3,*

482 *the transcription factor downstream of IL-10/IL-10R engagement*(Donnelly et al.,  
483 *1999), led to decreased frequencies of cells with HIV DNA as a consequence of*  
484 *the downregulation of the key pathways sustaining reservoir survival, latency and*  
485 *longevity (metabolically active TCM cells). We have shown that IL-10 is produced*  
486 *by several cellular subsets including innate immune cells, B cells and T cells i.e*  
487 *most probably Tr1*(Zhang and Kuchroo, 2019) *or Tfr cells*(Laidlaw et al., 2017) *in*  
488 *all 3 anatomical sites in the lymph nodes. IL-10 expression is controlled by several*  
489 *transcription factors*(Kubo and Motomura, 2012, Zhang and Kuchroo, 2019) *that*  
490 *can be triggered by TLRs as shown by our results (NFKB1, EOMES, STAT1)*  
491 *and/or by TCR/CD28 engagement (NFKB1, EOMES, STAT1)*(Zhang and  
492 *Kuchroo, 2019). Microbial products can also trigger B cells and innate immune*  
493 *cells to produce IL-10*(Boonstra et al., 2006, Saemann et al., 2000, Liu et al., 2014),  
494 *which in turn, will promote the differentiation of IL-10 producing Tr1 cells*(Asseman  
495 *and Powrie, 1998). Given that we and others have demonstrated that*  
496 *gastrointestinal tract damage and dysfunction, and microbial translocation persists*  
497 *in individuals on long-term ART*(Somsouk et al., 2015), *there is a continual*  
498 *systemic source of stimulation that could result in high levels of IL-10 driving viral*  
499 *persistence. Further *in vivo* models suggest a role for the gut flora in triggering IL-*  
500 *10 and regulating homeostatic interactions with commensal microorganisms as IL-*  
501 *10 dependent immunopathology is reversed under germ-free conditions*(Sellon et  
502 *al., 1998). While our results do not discriminate between cells that bind IL-10 and*  
503 *cells that produce IL-10 we provide herein statistically significant evidence that the*  
504 *proximity of IL-10+ cells to HIV DNA+ cells in the LN tissues further supports the*

505 notion that IL-10 is important for HIV persistence *in vivo* in tissues. The co-  
506 localization of pSTAT3+ and vDNA+ cells to IL-10+ cells, and the increased  
507 frequencies of vDNA+ cells in the vicinity of IL10+ cells further implicates this  
508 cytokine in promoting HIV persistence in lymph nodes. IL-10 induces latency by  
509 downregulating the expression of several transcription factors that are involved in  
510 promoting HIV transcription including NFK-b, C/EBPb, NFAT, Ets/PU.1(Schiralli  
511 Lester and Henderson, 2012), or by promoting the expression of TFs that can  
512 repress HIV LTR activity (PRDM-1)(Kaczmarek Michaels et al., 2015). In the  
513 periphery, IL-10 also plays a major role in HIV persistence as demonstrated by the  
514 fact that IL-10 was unique among all cytokines that signal through STAT3,  
515 including IL-6 and IL-21, to be associated with HIV reservoir size. Differences in  
516 signaling and transcriptional activity between IL-10 and IL-6 have been previously  
517 reported. Expression of SOCS3 upon IL-10R engagement does not lead to IL-10  
518 receptor degradation, keeping IL-10 signaling constant(Niemand et al., 2003).  
519 IL-10 signaling enhances the survival of different immune and non-immune cell  
520 subsets(Zhou et al., 2001, Levy and Brouet, 1994, Todaro et al., 2006, Boyd et al.,  
521 2003) including B cells, which are critical for the maintenance of Tfh  
522 numbers(Cubas et al., 2013). While many studies associate IL-10 induced cell  
523 survival to BCL2 expression, here we show that the increased survival involves the  
524 upregulation of several anti-apoptotic molecules (Bcl2, BclX-l, Pim1, BIRC5)  
525 downstream of IL-10 signaling. Enhanced survival could have a direct impact on  
526 HIV persistence by enhancing the dissemination of infectious HIV virions to  
527 bystander cells in sites where antiviral drugs show poor levels of

528 penetrance(Gavegnano et al., 2017). Additional to endorsing cell survival,  
529 homeostatic proliferation(Virgilio and Collins, 2020) and/or clonal expansion(Liu et  
530 al., 2020) could further contribute to increased size of the HIV reservoir.  
531 Importantly, the usage of an FDA-approved BCL2 antagonist, venetoclax, during  
532 HIV reactivation, led to cell death and HIV reservoir decay(Cummins et al., 2017),  
533 we also observed that IL-10 signaling blockade led to HIV decay.

534 Our data shows that the heightened levels of pIL-10 is associated with increased  
535 expression of Co-IRs, including PD-1, which we and others have shown to trigger  
536 T cell quiescence and HIV latency(Evans et al., 2018, Porichis and Kaufmann,  
537 2012, Fromentin et al., 2019). Early upon infection, cellular activation leads to PD-  
538 1 expression as part of the cascade and HIV preferentially replicates in PD-1+ CD4  
539 T cells(Vollbrecht et al., 2010). However, the binding of PD-1 and other Co-IRs to  
540 its ligands triggers T cell quiescence(Fromentin et al., 2019); additionally, the  
541 expression of PD-1 blocks the differentiation of TCM cells to TEM(Trautmann et  
542 al., 2006, Breton et al., 2013, Kulpa et al., 2013). This mechanism provides support  
543 for the association between IL-10, PD-1 and frequencies of cells with HIV  
544 integrated DNA. Interestingly, the expression of Co-IRs was shown to lead to  
545 increased IL-10 production(Dong et al., 1999) upon ligand binding. Of note, we  
546 have previously shown that PD-1 stimulation can induce production of IL-10 by  
547 myeloid cells and suppression of antiviral immunity(Said et al., 2010). IL-10  
548 triggers pathways associated with cell quiescence, and further impedes effector  
549 cell differentiation by upregulating transcriptional factors (TFs) associated with  
550 maintenance of TCM (TCF7, Notch, FOXO1 and Foxp1(Tang et al., 2012)), and

551 by downregulating TFs critical for effector function (NFAT, NFKb). Furthermore, as  
552 mentioned previously, the upregulation of PD-1 by IL-10 is associated with  
553 blockade of T cell memory differentiation and their accumulation as  
554 TCM(Trautmann et al., 2006, Breton et al., 2013, Kulpa et al., 2013); this would  
555 contribute to the increased accumulation of these cells that are the long-lasting  
556 HIV reservoir. Heightened pIL-10 levels have been associated with poor effector  
557 function and absence of viral clearance in chronic viral infections(Tian et al., 2016)  
558 most probably due to the lack of differentiation of TCM to cells endowed with  
559 antiviral effector activity. Relevant to this hypothesis, T cells from IL-10<sup>-/-</sup> mice  
560 exhibited a highly activated phenotype, expressed antiviral cytokines and  
561 promoted degranulation in response to cognate Ag-encounter *ex vivo* and were  
562 oligoclonal suggesting an ongoing immune response(Jones et al., 2010). In  
563 addition to preventing the differentiation of TCM to TEM, IL-10 promotes survival  
564 of all memory cell subsets including TEM, which was shown to have the highest  
565 levels of inducible HIV(Kulpa et al., 2019). In our experimental model, IL-10  
566 blockade *in vitro*, removed the survival signal, additional to promoting T cell  
567 activation, by downmodulating Co-IRs, and differentiation towards TEM.  
568 Importantly, IL-10 helps to fuel cell longevity by promoting a balanced immune  
569 metabolism. Much is known about the impact of IL-10 on the metabolism of innate  
570 immune cells as it promotes oxidative phosphorylation in macrophages(Ip et al.,  
571 2017). IL-10 induces mitophagy that eliminates dysfunctional mitochondria  
572 characterized by low membrane potential and a high level of reactive oxygen  
573 species(Ip et al., 2017). In the absence of IL-10 signaling, macrophages



574 accumulate damaged mitochondria(Ip et al., 2017). *Herein, we show that IL-10*  
575 *triggers enhanced cell metabolism by promoting glycolysis.*

576 The impact of IL-10 on Tfh differentiation is significant, and to the best of our  
577 knowledge this is the first time that these findings are reported. Previous results  
578 have shown that IL-10 levels are associated with poor development of functionally  
579 mature memory Th1 cells while being positively correlated to increased  
580 frequencies of Tfh cells during acute LCMV infection(Tian et al., 2016). Tfh cells  
581 are known to harbor HIV intact provirus and can be a source of replication  
582 competent virus(Perreau et al., 2013) under ART interruption. Tfh cells provide  
583 help for the differentiation and maturation survival of GC B cells(Crotty, 2019), that  
584 are known to produce IL-10(Burdin et al., 1997). Additionally, in the GC  
585 environment, the IL-10 production is boosted by IL-21, produced by Tfh cells, and  
586 the phosphorylation of STAT3 further enhances IL-10 production(Banko et al.,  
587 2017). A complex network of TFs, including BCL-6, interferon regulatory factor  
588 (IRF4), c-Maf, and BATF, promotes Tfh differentiation while inhibiting alternate  
589 CD4 T cell differentiation pathways(Aid et al., 2018), all upregulated at gene and/or  
590 protein level in our study and associated with the size of the HIV reservoir. Indeed,  
591 Tfh cells were demonstrated to be both productively (i.e., vRNA<sup>+</sup>) and latently (i.e.,  
592 vDNA) infected at higher frequencies(Perreau et al., 2013, Lindqvist et al., 2012)  
593 than non-Tfh cells. Tfh cell accumulate in chronic infection(Maceiras et al., 2017)  
594 and this could be related to the higher levels of IL-10 in LNs of HIV-aviremic  
595 individuals as shown by our results. Tfh cells can be characterized by the  
596 expression of PD1, that is also upregulated by IL-10. Additionally, we have

597 observed BCL2L12 known to promote T cell survival is also included in the Tfh  
598 signature. In the current study, we have shown that IL-10+ and vDNA+ cells are  
599 colocalized in the GC area, indicating that aside of promoting the differentiation  
600 and survival of the Tfh cells, IL-10 is consequently contributing to the survival of  
601 the HIV reservoir in this important compartment.

602 Pre-clinical interventions using anti-IL-10 have been performed in several studies  
603 and despite some concerns regarding safety, have led to positive outcomes. The  
604 blockade of IL-10 in the LCMV model led to the inhibition of viral persistence and  
605 enhanced T-cell functions(Ejrnaes et al., 2006, Brockman et al., 2009). IL-10  
606 blockade, in addition to clear chronic viral infections in animal models, also  
607 improved cytotoxic T cell responses in immunization models(Pitt et al., 2012). In  
608 HIV infection, IL-10Ra blockade resulted in markedly increased secretion of IFN-g  
609 by CD4+ T cells(Saeidi et al., 2018) as well restored the polyfunctionality of HCV  
610 specific T cells(Wilson and Brooks, 2011, Rigopoulou et al., 2005). Dual IL-  
611 10R/PD1 blockade further enhanced T cell activity, suggesting that IL-10 and PD-  
612 1/PD-L1 are functional through distinct pathways to suppress T cell activity during  
613 persistent viral infection(Brooks et al., 2008). Of note, pegylated IL-10 has been  
614 shown to enhance CD8 T cell function in cancer patients(Naing et al., 2018, Mumm  
615 and Oft, 2013) in sharp contrast to several other studies, where IL-10 negatively  
616 impact T cell function(Kahan and Zajac, 2019). Our results show that an anti-IL-10  
617 antibody(L., 2005), was effective in down-regulating *in vitro* the expression of  
618 proteins which are part of major pathways associated *in vivo* to HIV persistence,  
619 leading to HIV decay in vitro. *Altogether our results feature IL-10 blockade as a*

620 *promising and powerful strategy to revert immune-suppression and to impede on*  
621 *HIV reservoir maintenance leading to a HIV cure.*

622

623

624

## 625 **STAR METHODS**

626

### 627 **EX VIVO**

628 **Cohort.** HIV-Aviremic individuals (n= 42) and HIV negative healthy controls (n=10)  
629 (**Table S1**) signed informed consent approved by the Royal Victoria Hospital and  
630 the CRCHUM Hospital Institutional Review Boards. Plasma, Peripheral blood  
631 mononuclear cells (PBMCs) and whole blood paxgene tubes were collected.  
632 Plasma viral load was evaluated with the Amplicor HIV-1 Monitor Ultrasensitive  
633 Method (Roche)(Sun et al., 1998).

634

635 **Isolation of CD4+ T cells.** PBMCs were isolated from blood samples or  
636 leukapheresis products by Ficoll Hypaque density gradient centrifugation(Fuss et  
637 al., 2009). Total CD4+ T cells were isolated from PBMCs by negative magnetic  
638 selection (Stemcell technologies). The purity of enriched CD4+ T cells was  
639 generally greater than 95%, as assessed by flow cytometry (data not shown).

640

641 **Plasma cytokines quantification.** Multiplex ELISA (Mesoscale): U-PLEX assay  
642 (Meso Scale MULTI-ARRAY Technology) commercially available by Meso Scale

643 Discovery (MSD) was used for plasma cytokine detection. This technology allows  
644 the evaluation of multiplexed biomarkers by using custom made U-PLEX sandwich  
645 antibodies with a SULFO-TAG™ conjugated antibody and next generation of  
646 electrochemiluminescence (ECL) detection. The assay was performed according  
647 to the manufacturer's instructions  
648 ([https://www.mesoscale.com/en/technical\\_resources/technical\\_literature/technical](https://www.mesoscale.com/en/technical_resources/technical_literature/technical_notes_search)  
649 [notes\\_search](https://www.mesoscale.com/en/technical_resources/technical_literature/technical_notes_search)). In summary, 25µL of plasma from each donor was combined with  
650 the biotinylated antibody plus the assigned linker and the SULFO-TAG™  
651 conjugated detection antibody; in parallel a multi-analyte calibrator standard was  
652 prepared by doing 4-fold serial dilutions. Both samples and calibrators were mixed  
653 with the Read buffer and loaded in a 10-spot U-PLEX plate, which was read by the  
654 MESO QuickPlex SQ 120. The plasma cytokines values (pg/mL) were  
655 extrapolated from the standard curve of each specific analyte. Plasma cytokines  
656 levels were analyzed to test for differences between HIV-avireemics and Health  
657 Controls (HC). Unpaired non-parametric Mann-Whitney T-test was performed.  
658 Negative log 10 (-log10) values of the cytokines was plotted against log2 of the  
659 fold change (FC) between HIV avireemics and HIV negative healthy controls. Linear  
660 regression and Spearman correlation were performed against HIV IntDNA  
661 measures. Negative log 10 (-log10) values of HIV IntDNA was plotted against  
662 Spearman rho values HIV avireemics.

663

664 **Integrated HIV DNA quantification.** CD4+ T cells isolated from aviremic donors  
665 were digested and cell lysates were directly used in a nested Alu PCR to quantify

666 both integrated HIV DNA and CD3 gene copy numbers, as previously  
667 described(Vandergeeten et al., 2014).

668

669 **Microarray.** Gene signature profile was assessed using Illumina Human version 4  
670 beadchips (Illumina) at 58 °C for 20 h. RNA was isolated using the Rneasy micro  
671 kit (Qiagen) and the quantity and quality of the RNA were confirmed using a  
672 NanoDrop 2000c (Thermo Fisher Scientific) and an Experion Electrophoresis  
673 System. Samples (50 ng) were amplified using Illumina TotalPrep RNA  
674 amplification kits (Ambion) as per manufacture instructions. The chips were  
675 scanned using Illumina's iSCAN and quantified using Genome Studio (Illumina).  
676 Raw beadchips intensities were quantile-normalized and log2-transformed.

677

678 **Multiparameter confocal imaging.** Confocal imaging was performed with  
679 formalin fixed paraffin embedded (FFPE) lymph node sections prepared at a ~5  
680 µm thickness. Tissue sections were deparaffinized by bathing in xylene and serial  
681 ethanol dilutions. Antigen retrieval was performed at 110°C for 15 minutes using  
682 Borg Decloaker RTU (Biocare Medical). Tissue sections were then blocked,  
683 permeabilized for 1 hour at room temperature and stained with the following  
684 primary and conjugated antibodies: anti-CD20 eFluor 615 (clone L26), anti-Ki67  
685 Brilliant Violet 421 (clone B56), anti-CD4 Alexa Fluor 488 (Goat polyclonal IgG,  
686 FAB8165G, R&D systems), anti-IL-10 (rabbit polyclonal, ab34843, Abcam) and  
687 either anti FoxP3-Alexa Fluor 647 (clone 206D) or anti CD68 (clone KP-1) and  
688 CD163- Alexa Fluor 647 (clone EDHu-1) depending on the panel. The nuclear

689 stain Jojo-1 (Life Technologies) was also used to delineate individual cells.  
690 Stainings were carried out consecutively with the primary antibodies being added  
691 first and incubated overnight at 4° C, followed by staining with the appropriate  
692 secondary antibody which –depending on the panel - was either Alexa Fluor 546  
693 goat anti-rabbit IgG for IL-10 (ThermoFisher Scientific, A11010) or Alexa Fluor 488  
694 goat anti-mouse IgG1 for CD68 (ThermoFisher Scientific, A21121). Conjugated  
695 antibody stainings were performed for 2 hours at room temperature, after which  
696 sections were stained with JoJo-1 for nucleus identification. Images were acquired  
697 at a 512 x 512 pixel density using a 40x objective (NA 1.3) on a Nikon confocal  
698 system running NIS-elements AR. Fluorophore spectral spillover was corrected  
699 through live spectral un-mixing (NIKON).

700

701 **Histo-cytometry and imaging analysis.** Post-acquisition analysis was performed  
702 using the Imaris software (Bitplane, version 8.4). Histo-cytometry was performed  
703 as previously described(Gerner et al., 2012, Petrovas et al., 2017). Briefly,  
704 dimensional imaging datasets were segmented based on their nuclear staining  
705 signal and average voxel intensities for all channels were extrapolated in Imaris  
706 after iso-surface generation. Data were then exported to Microsoft Excel,  
707 concatenated into a single comma separated values (csv) format and imported into  
708 FlowJo version 10 for further analysis. The results of the histocytometry  
709 quantification were expressed as average frequencies.

710

711 **Next-generation HIV DNA in situ hybridization and immunofluorescent**  
712 **detection for confocal phenotypic analysis.**

713 The next-generation *in situ* hybridization method DNAscope(Deleage et al., 2016)  
714 and multiplex immunofluorescence staining were performed on 5 µm thick sections  
715 from FFPE lymph node biopsies from HIV-1 infected, cART suppressed  
716 participants from Emory University and Case-Western Reserve University cohorts,  
717 along with FFPE ACH-2 HIV-1 positive controls [obtained through the NIH AIDS  
718 Reagent Program, Division of AIDS, NIAID, NIH: ACH-2 Cells from Dr. Thomas  
719 Folks (cat# 349)](Clouse et al., 1989, Folks et al., 1989) and human HIV-uninfected  
720 lymph node negative controls from the OHSU Biolibrary. DNAscope was  
721 performed according to Deleage *et al*(Deleage et al., 2016) with some  
722 modifications. Briefly, slides were deparaffinized by heating at 60°C for 1 hour,  
723 followed by two 5-minute xylene incubation and two 1-minute 100% ethanol  
724 incubations. Slides were then kept in double distilled water for 1 hour before heat  
725 induced epitope retrieval using the ACD Target Retrieval Buffer and the Biocare  
726 NxGen Decloaking Chamber that was set to 110°C for 15 min. After the Decloaking  
727 Chamber was cooled to 95°C, the slides were removed from the chamber and  
728 cooled at room temperature for a further 15 minutes. Slides were then rinsed twice  
729 in double distilled water and tissues were kept wet throughout the rest of the  
730 protocol. Protease treatment was omitted to improve antibody epitope preservation  
731 and staining. Slides were incubated for 10 minutes at room temperature with 3%  
732 Hydrogen peroxide diluted in PBS to inactivate endogenous peroxidases. The HIV-  
733 1 Clade B sense probe (ACDbio cat. No. 425531) was added to the tissue for a

734 14-hour incubation at 40°C in a HybEz oven. The ACDBio RNAscope 2.5 Brown  
735 kit was used to amplify vDNA signal according to manufacturer's  
736 recommendations, with the exception that wash steps were performed with 0.5X  
737 RNAscope wash buffer. In addition, after Amp 5 and 6, slides were washed with  
738 1X TBS-Tween-20 (0.05% v/v) instead of ACD wash buffer. Viral DNA  
739 fluorescence signal was developed using the ThermoFisher Alexa Fluor (AF)647  
740 Tyramide Reagent followed by boiling in ACDBio Target Retrieval buffer for 10  
741 minutes at 95-100°C to inactivate the HRP. Immunofluorescence antibody staining  
742 was performed using a rabbit anti-Human IL-10 antibody (Abcam ab-34843), a  
743 rabbit anti-pSTAT3 antibody (Cell Signaling 9145) and a mouse anti-CD20  
744 antibody (Dako M0755). The anti-IL-10 antibody was labelled using an HRP-  
745 conjugated polymer anti-rabbit secondary antibody (GBI Labs D13-110) and  
746 developed with AF568 Tyramide reagent (ThermoFisher), followed stripping of the  
747 primary rabbit antibody and inactivation of the HRP by boiling in ACDBio Target  
748 Retrieval buffer for 10 minutes at 95-100°C. Subsequent anti-pSTAT3 and anti-  
749 CD20 staining were labelled with AF 750 conjugated anti-rabbit and AF488  
750 conjugated anti-mouse secondary antibodies (ThermoFisher) respectively.  
751 Tissues were counterstained with DAPI and cover slipped with #1.5 GOLD SEAL  
752 cover glass (EMS) using Prolong® Gold reagent (ThermoFisher).

753

#### 754 **Quantitative image analysis**

755 To quantify the number of vDNA+, IL-10+ and/or pSTAT3+ cells on stained tissues,  
756 whole-slide high-resolution fluorescent scans were performed at 20X using the



757 Zeiss AxioScan Z.1 slide scanner. DAPI, AF488, AF568, Cy5 (For AF647) and Cy7  
758 (For AF750) channels were used to acquire images. The exposure time for image  
759 acquisition was between 4 and 150 ms. Multi-spectral images were analyzed using  
760 the HALO 2.3 platform (Indica Labs) using the following analysis methods: For  
761 HIV-1 vDNA, cells with clear punctate dots were quantified using the module FISH  
762 v1.1. Thresholds for spot size and intensity were standardized against the vDNA  
763 signal in ACH-2 cells, which has at least one integrated provirus per cell. Total cell  
764 count per tissue was also performed using this module. For the quantification of  
765 the total number of pSTAT3+ and IL-10+ cells per tissue, the FISH v1.1 module  
766 was also used. The Nearest Neighbor and Proximity Analysis were performed with  
767 the Spatial Analysis plot function of HALO, using the object data derived from the  
768 previous individual analyses discussed above. Manual curation was performed to  
769 confirm the accurate quantification of vDNA+ cells and their individual IL-10 and  
770 pSTAT3 status.

771

## 772 **IN VITRO**

773 **Primary CD4+ T Cell Isolation and Culture.** Briefly, primary human CD4+ T cells  
774 from healthy donors were isolated from donated leukoreduction chambers.  
775 Peripheral blood mononuclear cells (PBMCs) were isolated by Ficoll centrifugation  
776 using SepMate tubes (STEMCELL, per manufacturer's instructions). Bulk CD4+ T  
777 cells were subsequently isolated from PBMCs by magnetic negative selection  
778 using an EasySep Human CD4+ T Cell Isolation Kit (STEMCELL, per  
779 manufacturer's instructions). Alternately, memory CD4+ T cells were isolated from

780 PBMCs by magnetic negative selection using an EasySep™ Human Memory  
781 CD4+ T Cell Enrichment Kit (STEMCELL, per manufacturer's instructions).  
782 Isolated CD4+ T cells were suspended in complete Roswell Park Memorial  
783 Institute (RPMI), consisting of RPMI-1640 (Sigma) supplemented with 5mM 4-(2-  
784 hydroxyethyl)-1-piperazineethanesulfonic acid (HEPES, Corning), 2mM  
785 Glutamine (UCSF Cell Culture Facility), 50µg/mL penicillin/streptomycin (P/S,  
786 Corning), 5mM sodium pyruvate (Corning), and 10% fetal bovine serum (FBS,  
787 Gibco).

788

#### 789 ***IL-10 stimulation in vitro***

790 Viable frozen primary human PBMCs cells from healthy donors were thawed,  
791 counted and rested for 2 hours at 37C, 5% CO2 at a concentration of 2 million  
792 PBMCs/mL in vented cap bottles in complete Roswell Park Memorial Institute  
793 (RPMI), consisting of RPMI-1640 (Sigma) supplemented with 5mM 4-(2-  
794 hydroxyethyl)-1-piperazineethanesulfonic acid (HEPES, Corning), 2mM  
795 Glutamine (UCSF Cell Culture Facility), 50µg/mL penicillin/streptomycin (P/S,  
796 Corning), 5mM sodium pyruvate (Corning), and 10% fetal bovine serum (FBS,  
797 Gibco). Upon resting, 1 million PBMCs were transferred to 48-well plate left  
798 unstimulated or were stimulated with IL-10 [10ng/mL] plus or minus anti-IL-10  
799 [10ug/mL] for 24 hours. Brefeldin (1:1000) was added for extra 6 hours in culture  
800 (total 30hours). The expression of Tfh markers (CXCR5, PD1, c-Maf and Bcl6 and  
801 IL21) were evaluated by flow cytometry.

802 To evaluate IL-10 signaling through phosphorylation of STAT3 (pSTAT3), different  
803 doses of anti-IL-10 was used [0.1-100ug/mL] in addition to IL-10 [10ng/mL].  
804 pSTAT3 MFI was evaluated after 30 minutes of stimulation by flow cytometry.

805

806 **Microarray for IL-10 induced specific signatures in CD4 T cells.** CD4 T cells  
807 were isolated from PBMCs from healthy donors (n= 6) were cultured for 12 hours  
808 with 10ng/mL of rIL-10 or left unstimulated. Microarray was performed as for the  
809 *ex vivo* experiments.

810

811 **STAT3KO. RNP Production.** Detailed protocols for RNP production and primary  
812 CD4+ T cell editing have been previously published(Hultquist et al., 2019). Briefly,  
813 lyophilized crRNA and tracrRNA (Dharmacon) were suspended at a concentration  
814 of 160  $\mu$ M in 10 mM Tris-HCL (7.4 pH) with 150 mM KCl. 5 $\mu$ L of 160 $\mu$ M crRNA  
815 was mixed with 5 $\mu$ L of 160 $\mu$ M tracrRNA and incubated for 30 min at 37°C. The  
816 gRNA:tracrRNA complexes were then mixed gently with 10 $\mu$ L of 40 $\mu$ M Cas9 (UC-  
817 Berkeley Macrolab) to form Cas9 ribonucleoproteins (RNPs). Five 3.5 $\mu$ L aliquots  
818 were frozen in Lo-Bind 96-well V-bottom plates (E&K Scientific) at -80°C until use.

819 **Editing of Resting Memory CD4+ T Cells.** Each reaction consisted of 30x10<sup>6</sup>  
820 CD4 T cells, 3.5  $\mu$ L RNP, 1  $\mu$ L Alt-R Cas9 Electroporation Enhancer (100  $\mu$ M, IDT)  
821 and 20  $\mu$ L electroporation buffer. Immediately after isolation, resting memory CD4+  
822 T cells were suspended and counted. RNPs were thawed and allowed to come to  
823 room-temperature. One microliter of Alt-R Cas9 Electroporation Enhancer was  
824 added to each RNP mixture with gentle mixing. Immediately prior to

825 electroporation, cells were centrifuged at 400xg for 5 minutes, supernatant was  
826 removed by aspiration, and the pellet was resuspended in 20  $\mu$ L of room-  
827 temperature P2 electroporation buffer (Lonza) per reaction. Twenty microliters of  
828 cell suspension were then gently mixed with each RNP mixture and aliquoted into  
829 an electroporation cuvette for nucleofection with the 4D 96-well shuttle unit (Lonza)  
830 using pulse code EH-100. Immediately after electroporation, 80  $\mu$ L of pre-warmed  
831 media without IL-2 was added to each well and cells were allowed to rest for at  
832 least one hour in a 37°C cell culture incubator. Subsequently cells were moved to  
833 vented-bottomed culture bottles pre-filled with warm complete media with IL-2 at  
834 40 IU/mL (for a final concentration of 20 IU/mL). Cells were cultured at 37°C / 5%  
835 CO<sub>2</sub> in a dark, humidified cell culture incubator for 4 days to allow for gene knock-  
836 out and protein clearance, with additional media added on day 2. To check STAT3  
837 knock-out efficiency, 50  $\mu$ L of mixed culture was removed to a centrifuge tube.  
838 Cells were staining for total STAT3 monoclonal antibody by flow cytometry. For the  
839 LARA experiments a combination of guides 3 and 4 from Dharmacon was used  
840 (CM-003544-03-0020, CM-003544-04-0020).

841

842 **LARA (Latency and Reversion assay).** Briefly, on day 0 memory CD4 T cells  
843 were isolated. T cells were immediately knocked out for STAT3 or NT and kept in  
844 IL-10 [10ng/mL] containing media or non-transfected and cultivated in cRPMI for  
845 2-3 days. On Day 4, cells were HIV infected by spinoculation with the full-length  
846 replication competent HIV clone 89.6. Immediately after spinoculation, cells were  
847 resuspended in IL-2 [30U/mL] and Saquinavir [5uM]. Infected cells were incubated

848 for an additional 2-3 days before being introduced into latency culture conditions.  
849 For the transfected conditions latency media was composed of antiretroviral  
850 cocktail (ARV) of 100 nM efavirenz, 200 nM raltegravir, and 5  $\mu$ M saquinavir (NIH  
851 AIDS Reagent Program; 4624, 11680, and 4658), IL7 [40ng/mL] and IL-10  
852 [10ng/mL]. Non-transfected conditions were cultured in ARV+ IL-7, ARV+ IL-7+IL-  
853 10, ARV+ IL-7+IL-10+aIL-10 [10ug/mL] in order to evaluate the role of IL-10 on  
854 latency induction. Gold standard latency inducer media was ARV+ IL-7+TGFb1  
855 [20ng/mL] in media composed 50% of H80 supernatant culture(Kulpa et al., 2019).  
856 Cells were maintained in this media for 11 days. Half media change was performed  
857 every 3-4 days. HIV protein expression decay as the evaluation of other major  
858 proteins, of the IL-10 modulated pathways were accessed by flow cytometry. Ten  
859 thousand cells were saved at the last day of latency for HIV IntDNA evaluation in  
860 the IL-10 containing media conditions.

861

862 **Cell Preparation and flow cytometry.** PBMCs were prepared from whole blood  
863 by ficoll-hypaque density sedimentation and cryopreserved in 10% dimethyl  
864 sulfoxide and 90% FBS until thawing for phenotypic analysis. Panels to evaluate  
865 Survival, Co-IRs, memory subsets, Immune metabolism, Tfh markers and HIV  
866 protein expression were performed. Markers were combined in different panels to  
867 address the above questions. Antibodies summarized in **Table S7** were used. Flow  
868 cytometry data were analyzed to test for differences among the different stim  
869 conditions. All antibodies were properly titrated. The cells were all surface stained  
870 for 20 minutes in the dark at room temperature, washed, fixed and permeabilized

871 using the eBioscience™ Foxp3 / Transcription Factor Staining Buffer Set (Cat# 00-  
872 5523-00), as per manufacture instructions. Intracellular staining was performed in  
873 Perm-Wash provided by the kit for 45 minutes at 4°C. Samples were then washed  
874 and re-suspended in staining buffer for acquisition. Samples were acquired on  
875 LSRII flow cytometer (Becton Dickinson, San Jose, CA) and ~500,000 live-gated  
876 events were collected. Data were analyzed using Flow-Jo software (TreeStar,  
877 Ashland, OR). A lymphocyte gate based on FSC-A and SSC-A was defined. Single  
878 cells were then selected using FSC-A x FCS-H gate. Live cells were gated and  
879 successive gates to define T cell populations of interest. TSNE analysis (t-  
880 distributed stochastic neighbor embedding) or UMAP analysis (Uniform Manifold  
881 Approximation and Projection for Dimension Reduction) were performed in live  
882 single cells for unbiased evaluation of the distribution of the key markers of the  
883 major pathways identifies by gene expression *ex vivo* and *in vitro*.

884

885 **Reagents, antibodies and viruses.** IL-10 from Peprotech was used at 10ng/mL;  
886 IL-7 from R&D Systems was used at 40ng/mL; TGFb1 from Peprotech was used  
887 at 20 ng/mL; anti-IL-10 was produced and characterized by D. Gorman(L., 2005)  
888 specifically for this project, dose-response curve was performed evaluating  
889 blockage of STAT3 phosphorylation (**Fig S5b**) and 10ug/mL was used for the  
890 downstream analysis. Flow antibodies were acquired from BD, Biolegend,  
891 MedMab, Beckman Coulter, eBioscience and titrated for best performance in each  
892 flow panel (**Table S7**). Viruses were acquired from NIH reagents program (p89.6)  
893 and were produced by the virus core facility at CWRU.

894

895 **IN SILICO**

896 **Microarray Analysis.** Gene array was performed in PBMCs from HIV aviremic  
897 individuals. For each gene, a linear regression model with pIL-10 or HIV intDNA  
898 measurements in aviremic individuals as an independent variable and gene  
899 expression as a dependent variable was fit using the R package LIMMA. Genes  
900 that correlated with both outcomes using a Benjamini– Hochberg corrected p value  
901 of 0.05 were selected. Gene sets enrichment analysis (GSEA) in ex vivo samples  
902 revealed significant and positive correlation of gene signature with IntDNA and pIL-  
903 10 levels. Gene signatures were compiled from MSigDB C2 and C7 and other gene  
904 sets available in the literature. The LIMMA package was used to fit a linear  
905 regression model to each probe (log2 expression) to respectively IntDNA and pIL-  
906 10 levels. Genes that correlated to the outcomes were sorted from high to low  
907 using their coefficient correlation for each regression and then submitted to GSEA  
908 using the pre-Ranked list option. Signatures significantly enriched in these lists  
909 with an FDR cut-off of 5% were selected. GSEA normalized enrichment scores  
910 were plotted using pheatmap R package. Color gradient from blue to red depicts  
911 the normalized enrichment score ranging from decreased (blue) to increased (red).  
912 For the *in vitro* IL-10 induced gene signature the LIMMA R package was used to  
913 fit linear regression model with the log2 gene expression as dependent variable  
914 and the IL-10 stimulated and IL-10 unstimulated CD4 T cells as independent  
915 variables in order to identify genes differentially expressed between CD4 T cells  
916 stimulated by IL-10 at 12 hours compared to unstimulated CD4 T cells or genes

917 correlated to plasma IL-10 levels and HIV integrated DNA from ART suppressed  
918 (aviremic) samples. A moderated  $t$  test was used to assess the statistical  
919 significance of the association between gene expression and the groups of  
920 interest. The  $p$  value was adjusted for multiple testing using Benjamini and  
921 Hochberg correction method.

922 To identify pathways enriched in IL-10 stimulated genes at 12 hours and pathways  
923 enriched in genes correlated with plasma IL-10 levels and HIV integrated DNA in  
924 ART suppressed individuals, we use The GSEA Java desktop program was  
925 downloaded from  
926 “<http://www.broadinstitute.org/gsea/index.jsp>[[http://www.broadinstitute.org/gsea/i](http://www.broadinstitute.org/gsea/index.jsp)  
927 [ndex.jsp](http://www.broadinstitute.org/gsea/index.jsp)]” and the default parameters of GSEA preranked option with the following  
928 parameters: gene list ranked by their fold; number of permutations: 1000;  
929 enrichment statistic: weighted; seed for permutation: time, ignore genesets with  
930 less than 10 genes or more than 5000 genes; and the following pathways  
931 databases: Molecular Signatures Database (version 5.1) hallmark genesets<sup>46</sup>,  
932 canonical pathways (module C2.CP), transcription factor targets (module C3.TFT).  
933 Specific transcription factors target signatures including STAT3, BCL6 and MAF  
934 were extracted from pscan database (<http://www.beaconlab.it/pscan>) and the we  
935 used a T follicular helper signature as defined in Aid *et al*(Aid *et al.*, 2018).  
936 For pathways enrichment analyses, we applied a 5% cutoff on the false discovery  
937 rate (FDR) and a corrected  $p$  value of 0.05 on all the differential expression and  
938 the regression analyses. Genes network analyses and representation were



939 performed using GeneMania (<http://genemania.org>) and DyNet Analyzer  
940 application under Cytoscape 3.6.0 (<https://cytoscape.org>).

941

942 **Pathways enrichment analysis.** Gene set enrichment analysis was performed  
943 using GSEA and a compiled set of pathways from public data bases including  
944 MSigDB version 5.1 (<http://software.broadinstitute.org/gsea/msigdb/>) and blood  
945 cell marker signatures. To test for the enrichment of IL-10 and PD-1 signaling we  
946 used in-house signatures (unpublished data). The GSEA Java desktop program  
947 was downloaded from the Broad Institute  
948 (<http://www.broadinstitute.org/gsea/index.jsp>) and used with GSEA Pre-Ranked  
949 module parameters (number of permutations: 1,000; enrichment statistic:  
950 weighted; seed for permutation: 111;  $10 \leq$  gene set size  $\leq$  5,000). We used Dynet  
951 Analyzer application implemented in Cytoscape version 3.6.0 to generate gene  
952 interacting networks to highlight overlapping genes between the different enriched  
953 modules.

954

955 **Statistics.** Data sets were tested for a Gaussian distribution using the D'Agostino-  
956 Pearson omnibus normality test. Dependent upon the determination of data  
957 normality, correlations against plasma IL-10 concentrations were conducted using  
958 either a Pearson or nonparametric Spearman analyses. Longitudinal analyses  
959 comparing the concentration of plasma IL-10, the %IL-10<sup>+</sup> cells in LN by  
960 anatomical site, and vDNA<sup>+</sup> cells in LN were calculated using either a Mann-  
961 Whitney U test or a Wilcoxon matched-pairs signed rank test dependent upon the

962 replicate pairing and Gaussian distribution of the data. Analyses of the *in vitro*  
963 stimulations were conducted using a one-way ANOVA with matching and multiple  
964 comparisons with a Tukey correction. All statistical tests were two-sided and not  
965 adjusted for multiple comparisons. The shorthand representation of statistical  
966 significance is as follows: \* $P < 0.05$ ; \*\* $P < 0.01$ ; \*\*\* $P < 0.001$ ; \*\*\*\* $P < 0.0001$ . Data  
967 showing statistical outcomes are represented as mean  $\pm$  SEM. The above  
968 statistical analyses were performed using GraphPad Prism 6.0h. A Ridge  
969 Regression was performed for analyzing multiple linear regressions that suffer  
970 from co-linearity (plasma IL-10 and  $\log_{10}$  HIV IntDNA) using  $P \leq 0.20$  to balance  
971 for type I and II errors.

972 All univariate group-differences were analyzed using a non-parametric Wilcoxon-  
973 ranked test. Whereas, all univariate correlation analyses were done using a non-  
974 parametric Spearman's test.  $p < 0.05$  is reported as significant. MonteCarlo  
975 simulation approach implemented in the R package ([https://cran.r-  
976 project.org/web/packages/MonteCarlo](https://cran.r-project.org/web/packages/MonteCarlo)), was used to assess the significance of the  
977 overlap between *ex vivo* and *in vitro* pathways. Briefly, we simulated 1 million times  
978 3 different lists of pathways having with the same length as the *ex vivo* and the *in*  
979 *vitro* pathways. Next, we assessed the number of times the overlap between these  
980 3 lists is equal or higher than 47 using the MonteCarlo R function.

981

## 982 **Datasets Availability.**

983 The published article includes all datasets generated or analyzed during this study.

984

985 **Financial Support.** This work was supported by the National Institutes of Health  
986 (grants UO1 AI 105937 and RO1 AI 110334 and RO1 AI 11444201), the CWRU  
987 Center for AIDS Research (grant AI 36219), DARE (U19 AI 096109), CIAR  
988 (AI126603, AI124377) and the Fasenmyer Foundation. Rafick-Pierre Sekaly is the  
989 Richard J. Fasenmyer Professor of Immunopathogenesis

990

991 **Potential conflicts of interest.**

992 The authors declare the following conflicts of interest: LM, BH, DG and DH are  
993 employed by Merck Sharp & Dohme Corp., a subsidiary of Merck & Co., Inc., Kenilworth,  
994 NJ, USA and/or have financial interests in Merck & Co., Inc., Kenilworth, NJ, USA which  
995 also provided research support per reagents generation for this study.

996

997 **Acknowledgements**

998 We are grateful for the patients and clinical team.

999

1000 **Author contributions:** SPR and FPD conceptualized and conceived the  
1001 experimental approaches. SPR, CNC, JH, CD, EM, DK, LL, XX, BT, JT and CS  
1002 performed experiments in their area of expertise to address the major question.  
1003 RB, VM, JPG, NK, CP, MP, SGD, JDE and RPS provided samples and supervised  
1004 the execution of the major techniques on their labs, contributing to data plot and  
1005 interpretation. LM, BH, DG, DH developed, synthesized and tested anti-IL-10  
1006 monoclonal antibody. MA, JPG provided the bioinformatic analysis and data  
1007 integration. SPR and RPS wrote the manuscript. DHB, VM, CP, SGD, MP, JDE  
1008 and RPS, contributed to critical review of the manuscript. All authors contributed

1009 to the manuscript development and have critically reviewed and approved the final  
1010 version.

1011

## 1012 **Declaration of interests**

1013 The authors declare no competing interests.

1014

## 1015 **FIGURE LEGENDS**

1016

### 1017 **MAIN**

1018 **Fig 1. Significantly increased levels of circulating and lymph-nodes IL-10 in**

1019 **treated HIV infected individuals (aviremic) is associated with the size of**

1020 **latent HIV reservoir (HIV IntDNA).** **a)** Cytokine array was performed using Meso-

1021 Scale platform (MSD). pIL-10 levels were increased in HIV-aviremic individuals

1022 (n=24) when compared to HIV negative Healthy controls (HCs, n=4); **b)** pIL10

1023 levels were positively correlated to latent HIV reservoir as measured by HIV

1024 IntDNA; **c)** Representative image of IL-10 expression in LNs from 2 HIV negative

1025 HCs (left plots) or 2 HIV-ART individuals (right plots). Brown chromogenic IHC –

1026 IL-10+ cells –Brown; tissue color: hematoxylin staining; **d)** Quantification of IL-10+

1027 cells (frequency of total area) in different areas of the LN in HIV negative HC (back,

1028 n=7) and HIV-aviremics (blue, n=13). F (Follicle), TZ (T cell zone) and MC

1029 (medullary cord) are shown. Mann-Whitney unpaired T test was used to compare

1030 the frequencies of IL-10+ cells between different zones: F, TZ and MC; **e)**

1031 Representative DNAscope (vDNA: red), followed by pSTAT3 (green), IL-10 (cyan),

1032 CD20 (pink) and DAPI (grey) multiplexed immunofluorescence in two HIV-  
1033 aviremic. For each subject (1 and 2) the top row (magnification of 20x) 4 plots  
1034 represent: I - Full staining (overlap of all markers), II – Filtered in pSTAT3 and HIV-  
1035 vDNA, III – HALO spatial plot, IV – Overlay of I and III. Arrows point to vDNA+P-  
1036 STAT3+ and arrowheads point to vDNA+P-STAT3- cells. Nearest neighbor and  
1037 Proximity detection of HIV-1 vDNA+ cells to nearby IL-10+ cells was calculated  
1038 (plot III). The Spatial Proximity Map (III) shows the location of IL-10+ cells (Yellow  
1039 dots) and HIV-1 vDNA+ cells (Red dots) as detected and assigned by the HALO  
1040 software. The nearest IL-10+ cell to each HIV-1 vDNA+ cell is indicated by the  
1041 Proximity Line (gray); **f**) Frequencies of HIV DNA+ cells in the nearest IL10+ cell  
1042 area is calculated based on spatial proximity map (III). NS: not significant, \* $p < 0.05$ ,  
1043 \*\* $p < 0.01$ . LN: lymph nodes; IHC: Immunohistochemistry; FC: Fold Change. 5-7 $\mu$ m:  
1044 diameter of a single cell.

1045

1046 **Fig 2. Several lymphoid and non-lymphoid cell subsets contribute to IL-10**  
1047 **production in LNs of treated chronic aviremic HIV-infected individuals:**  
1048 **Monocytes, macrophages, CD4 T cells (Tregs, non-Tregs), B cells and Tfh**  
1049 **cells are IL10+ in the LNs from HIV-aviremic individuals.** a) Representative  
1050 confocal images (40x) of an LN section of a treated aviremic HIV+ individual  
1051 showing staining for CD20 (blue), Ki67 (yellow), IL-10 (red), CD68 (Cyan), CD163  
1052 (green) and the nuclear stain JoJo (upper row and left panel). Zoomed-in details  
1053 (upper row - middle and right panels) and single-color captions (bottom row - right  
1054 panel) are from a representative example of CD68/CD163/IL-10 staining that was

1055 used for the quantitation. Zoomed-in areas are presented in succession and each  
1056 zoom-in corresponds to the region demarcated by the white enclosure. **b)**  
1057 Representative confocal images (40x) of LN sections of two treated aviremic HIV+  
1058 individuals. Overviews on the left depict the total LN area imaged and distribution  
1059 of CD20 (blue), Ki67 (cyan), CD4 (green) in the tissues screened. Zoomed-in  
1060 details show the distribution of CD20 and CD4 in overlay with IL-10 (red) and  
1061 FoxP3 (magenta) at the follicular (CD20<sup>hi/dim</sup>) and extrafollicular (CD20<sup>-</sup>) junction  
1062 as denoted by the white dotted lines. Zoomed areas correspond to the red squares  
1063 shown in each tissue overview; **c)** IL10 location plot; **d)** Pooled histo-cytometry  
1064 data (n=5) showing the average frequency of IL-10<sup>hi</sup> cells in follicular (CD20<sup>hi/dim</sup>:  
1065 average 26.75%) versus extra-follicular (CD20<sup>-</sup>: 73.25%) areas as assessed by  
1066 multiparameter confocal imaging (FC EF/F: 3, p<0.05); Gating strategy in **Fig S2**;  
1067 **e)** Contribution of each of the subsets evaluated by confocal/histo-cytometry for  
1068 the total frequencies of IL10<sup>+</sup> cells in the F and EF. CD20<sup>+</sup>, CD68<sup>+</sup> CD168<sup>+</sup>,  
1069 CD163<sup>+</sup>CD68<sup>+</sup>, total CD4, CD4<sup>+</sup>Foxp3<sup>-</sup>, CD4<sup>+</sup>Foxp3<sup>+</sup>, co-stained for IL-10 are  
1070 shown contributing to 100% cells IL10<sup>+</sup> in each area; **f)** Representative IHC in BCF  
1071 from one HIV aviremic individual: CD20 (blue), IL10 (green), CD4 (red) and PD1  
1072 (Orange) staining. White and orange circles highlight CD4<sup>+</sup>PD1<sup>+</sup>IL10<sup>+</sup>,  
1073 CD4<sup>+</sup>PD1<sup>+</sup>IL10<sup>-</sup> cells, respectively; **g)** Frequencies of CD4<sup>+</sup>PD1<sup>+</sup>IL10<sup>+</sup> Tfh cells  
1074 (white circles) are shown.

1075

1076 **Fig 3. Pathways associated with cell survival, T cell memory maintenance,**  
1077 **co-inhibitory receptors expression, metabolism and Tfh cell differentiation**

1078 **are positively associated with pIL-10 levels and HIV IntDNA and specifically**  
1079 **induced by IL-10 stimulation in vitro.** Gene array was performed in whole blood  
1080 from HIV aviremic individuals. **a)** Linear regression model was performed for each  
1081 gene with pIL-10 or HIV intDNA as an independent variable. Gene expression as  
1082 a dependent variable was fit using the R package LIMMA. Genes that correlated  
1083 with both outcomes using a Benjamini– Hochberg corrected p value of 0.05 were  
1084 selected. The top 100 genes were plot using pheatmap R package. Rows  
1085 represent genes and columns represent samples. pIL-10 and HIV IntDNA were  
1086 used as continuous variables and their log 10 transformed values were shown on  
1087 the top of the heatmap; **b)** Gene sets enrichment analysis (GSEA) in *ex vivo*  
1088 samples revealed significant and positive correlation of gene signature with HIV  
1089 IntDNA and pIL-10 levels. Gene signatures were compiled from MSigDB C2 and  
1090 C7 and other gene sets available in the literature. The LIMMA package was used  
1091 to fit a linear regression model to each probe (log2 expression) to respectively HIV  
1092 IntDNA and pIL-10 levels. Genes that correlated to the outcomes were sorted from  
1093 high to low using their coefficient correlation for each regression and then  
1094 submitted to GSEA using the pre Ranked list option. Signatures significantly  
1095 enriched in these lists with an FDR cut-off of 5% were selected. GSEA normalized  
1096 enrichment scores were plotted using pheatmap R package. Color gradient from  
1097 blue to red depicts the normalized enrichment score (NES) ranging from  
1098 decreased (blue) to increased (red); **c)** IL10 stimulation *in vitro* induces the same  
1099 pathways associated with higher levels of HIV IntDNA and pIL-10 in chronic HIV  
1100 infected individuals. Gene array was performed in CD4+ T cells isolated from

1101 healthy donors and stimulated for 12 hours with IL-10 or left unstimulated. Gene  
1102 induced by IL-10 stimulation *in vitro* at 12 hours compared to unstimulated cells  
1103 were identified using the LIMMA R package and an adjusted p value cut-off of 0.05.  
1104 GSEA as described above was used to identify which gene sets are enriched in  
1105 IL-10 stimulated cells. Gene sets NES of pathways significantly induced by IL-10  
1106 are shown in the heatmap. Color gradient from blue to red depicts the enrichment  
1107 score ranging from decreased (blue) to increased (red). For both panels b and c,  
1108 pathways involved in the same signaling were grouped into modules of  
1109 STAT3\_IL10 signaling, survival, Tfh signaling, inhibitory molecules signaling,  
1110 memory signatures and metabolism; **d**) Network representation of Leading-edge  
1111 genes (LEGs) that contributed significantly to the enrichment of pathways induced  
1112 by IL10 and shown in panel **c**. Dynet application implemented under Cytoscape  
1113 was used to generate the network. Red diamonds nodes represent modules name.  
1114 The edge colors connect genes from each module (STAT3/IL10 signaling: black;  
1115 Inhibitory molecules signaling: dark blue; CD4 memory signatures: light blue; Tfh  
1116 signaling: indigo blue; mTOR: purple; Survival: green). Rectangles represent the  
1117 genes upregulated by IL-10. Highlighted as full red rectangles represent important  
1118 functional gene for each module.

1119

1120 **Fig 4. STAT3 knockout (KO) leads to decreased viral reservoir and to**  
1121 **decreased expression of major proteins of key pathways associated with HIV**  
1122 **persistence in vivo.** Memory CD4+ T cells were isolated from HIV negative  
1123 healthy controls, infected as in **Fig S3a**, and latency was induced at D3 using IL-



1124 10 (5ng/mL) or TGFb1 (20ng/mL) in media containing H80 cell supernatants(Kulpa  
1125 et al., 2019), ARVs and IL-7 (40ng/mL). **a)** Frequencies of HIV infected cells (CD4-  
1126 p24+) were evaluated at (day:D) D6, D12, D15 and D17. IL-10 induces HIV protein  
1127 expression decay at significantly higher levels than TGFb; **b)** HIV IntDNA copies  
1128 per/million CD4 T cells evaluation at D17 (ns: non-significant); **c)** Copies of HIV  
1129 IntDNA per million CD4 T cells after latency induction comparing all conditions  
1130 cultured in media containing IL-10 (10ng/mL) + IL7 (40ng/mL and ARVs): non-  
1131 transfected, NT and STAT3KO. Paired t test between conditions: \*\*p<0.01,  
1132 \*\*\*p<0.001. **d)** Expression of major proteins of each of the pathways associated  
1133 *ex vivo* with pIL-10 and HIV IntDNA levels were evaluated by flow cytometry in  
1134 CD4 T cells from LARA as described in **Fig S3a** (STAT3, BCL2, HIV-p24, PD1,  
1135 CCR7 and CD27). TSNE analysis was performed in all samples in a total of 3000  
1136 cells/sample CD45RA- gated as in **Fig S4b**. TSNE-heatmap for each marker is  
1137 shown. Low to high levels of protein expression are depicted in the gradient from  
1138 blue (low) to red (high). **e)** Heatmap summarizing the findings in the STAT3KO  
1139 transfected condition comparing STAT3hi to STAT3lo. Each row refers to a specific  
1140 marker and the p values associated to each of them based on paired t. test  
1141 comparing STAT3lo x STAT3hi. **f)** Heatmap summarizing the findings in the non-  
1142 transfected condition comparing IL10 and anti-IL10 containing media conditions.  
1143 Each row refers to a specific marker and the p values associated to each of them  
1144 based on paired t. test comparing IL10 x anti-IL10. **g)** Expression of metabolic  
1145 markers along with HIV-envelope expression was assessed in a second flow  
1146 panel. Same analysis strategy was applied as in **d)**. UMAP-heatmaps show the

1147 gradient of expression on each of the proteins independently. **h)** Heatmap  
1148 summarizing the findings in the IL10R+ and IL10R- from STAT3KO transfected  
1149 condition. Each row refers to a specific marker and the p values associated to each  
1150 of them based on paired t. test comparing IL10R+ and IL10R-. \*p<0.05, \*\*p<0.01,  
1151 \*\*\*p<0.0001, \*\*\*\*p<0.0001. Gate on IL10Ra expression was used since no  
1152 intracellular staining for STAT3 was performed in this panel.

1153

1154 **Fig 5. IL-10 leads to Tfh differentiation, a major HIV reservoir compartment.**

1155 **a)** IL10/STAT3/BCL6/c-maf (red node) LEGs (open dots) are shared and are part  
1156 of the major pathways associated to pIL-10 levels and HIV IntDNA ex vivo (green  
1157 nodes). Red-full dots, represent important genes for the function of each pathway.  
1158 Cytoscape was used to generate the gene network. **b)** PBMCs from healthy donors  
1159 were treated with IL-10 (10 ng/mL) +/- anti-IL10 mAb (10ug/mL) or left unstimulated  
1160 in complete media for 24 hours. Brefeldin was added for extra 6 hours in culture  
1161 (total 30hours). The expression of Tfh markers (CXCR5, PD1), its major  
1162 transcription factors (c-Maf and Bcl6) as well as the production of IL-21 were  
1163 evaluated by flow cytometry. **c)** After UMAP analysis, Cluster 19 was specifically  
1164 induced by IL-10. On top, density plots show the modulation of cluster 19 in the  
1165 different conditions. This cluster is STAT3hi/c-Mafhi, BCL6+ and IL21+ (counter  
1166 plots shown in **Fig S8c**). **d)** In the LARA model, 4 days after infection, BCL6+ cells  
1167 are significantly preferentially infected when compared to its BCL6- counterpart;  
1168 top: representative dot plot, bottom: quantification of CD4-p24+ cells in BCL6- or  
1169 BCL6+ T cells; **e)** Immuno-histochemistry in LNs from HIV aviremic individuals.

1170 Follicular (F) and Extrafollicular (EF) are shown (left image: white dotted line). In  
1171 the follicles, CD4+ T cells (blue) are enriched in HIV reservoir (HIV DNA – red and  
1172 white arrows). IL10+ cells are shown (green).

1173

## 1174 REFERENCES

- 1175 AID, M., DUPUY, F. P., MOYSI, E., MOIR, S., HADDAD, E. K., ESTES, J. D., SEKALY, R. P.,  
1176 PETROVAS, C. & RIBEIRO, S. P. 2018. Follicular CD4 T Helper Cells As a Major  
1177 HIV Reservoir Compartment: A Molecular Perspective. *Front Immunol*, 9, 895.  
1178 ASSEMAN, C. & POWRIE, F. 1998. Interleukin 10 is a growth factor for a population of  
1179 regulatory T cells. *Gut*, 42, 157-8.  
1180 AVDIC, S., CAO, J. Z., CHEUNG, A. K., ABENDROTH, A. & SLOBEDMAN, B. 2011. Viral  
1181 interleukin-10 expressed by human cytomegalovirus during the latent phase  
1182 of infection modulates latently infected myeloid cell differentiation. *J Virol*, 85,  
1183 7465-71.  
1184 BAJENOFF, M., EGEN, J. G., QI, H., HUANG, A. Y., CASTELLINO, F. & GERMAIN, R. N.  
1185 2007. Highways, byways and breadcrumbs: directing lymphocyte traffic in the  
1186 lymph node. *Trends Immunol*, 28, 346-52.  
1187 BANKO, Z., POZSGAY, J., SZILI, D., TOTH, M., GATI, T., NAGY, G., ROJKOVICH, B. &  
1188 SARMAY, G. 2017. Induction and Differentiation of IL-10-Producing  
1189 Regulatory B Cells from Healthy Blood Donors and Rheumatoid Arthritis  
1190 Patients. *J Immunol*, 198, 1512-1520.  
1191 BIXLER, S. L. & MATTAPALLIL, J. J. 2013. Loss and dysregulation of Th17 cells during  
1192 HIV infection. *Clin Dev Immunol*, 2013, 852418.  
1193 BOONSTRA, A., RAJSBAUM, R., HOLMAN, M., MARQUES, R., ASSELIN-PATUREL, C.,  
1194 PEREIRA, J. P., BATES, E. E., AKIRA, S., VIEIRA, P., LIU, Y. J., TRINCHIERI, G. &  
1195 O'GARRA, A. 2006. Macrophages and myeloid dendritic cells, but not  
1196 plasmacytoid dendritic cells, produce IL-10 in response to MyD88- and TRIF-  
1197 dependent TLR signals, and TLR-independent signals. *J Immunol*, 177, 7551-8.  
1198 BOYD, Z. S., KRIATCHKO, A., YANG, J., AGARWAL, N., WAX, M. B. & PATIL, R. V. 2003.  
1199 Interleukin-10 receptor signaling through STAT-3 regulates the apoptosis of  
1200 retinal ganglion cells in response to stress. *Invest Ophthalmol Vis Sci*, 44, 5206-  
1201 11.  
1202 BRETON, G., CHOMONT, N., TAKATA, H., FROMENTIN, R., AHLERS, J., FILALI-  
1203 MOUHIM, A., RIOU, C., BOULASSEL, M. R., ROUTY, J. P., YASSINE-DIAB, B. &  
1204 SEKALY, R. P. 2013. Programmed death-1 is a marker for abnormal  
1205 distribution of naive/memory T cell subsets in HIV-1 infection. *J Immunol*, 191,  
1206 2194-204.  
1207 BROCKMAN, M. A., KWON, D. S., TIGHE, D. P., PAVLIK, D. F., ROSATO, P. C., SELA, J.,  
1208 PORICHIS, F., LE GALL, S., WARING, M. T., MOSS, K., JESSEN, H., PEREYRA, F.,  
1209 KAVANAGH, D. G., WALKER, B. D. & KAUFMANN, D. E. 2009. IL-10 is up-

- 1210 regulated in multiple cell types during viremic HIV infection and reversibly  
1211 inhibits virus-specific T cells. *Blood*, 114, 346-56.
- 1212 BROOKS, D. G., HA, S. J., ELSAESSER, H., SHARPE, A. H., FREEMAN, G. J. & OLDSTONE,  
1213 M. B. 2008. IL-10 and PD-L1 operate through distinct pathways to suppress T-  
1214 cell activity during persistent viral infection. *Proc Natl Acad Sci U S A*, 105,  
1215 20428-33.
- 1216 BURDIN, N., ROUSSET, F. & BANCHEREAU, J. 1997. B-cell-derived IL-10: production  
1217 and function. *Methods*, 11, 98-111.
- 1218 CACCIARELLI, T. V., MARTINEZ, O. M., GISH, R. G., VILLANUEVA, J. C. & KRAMS, S. M.  
1219 1996. Immunoregulatory cytokines in chronic hepatitis C virus infection: pre-  
1220 and posttreatment with interferon alfa. *Hepatology*, 24, 6-9.
- 1221 CAI, Y., ABDEL-MOHSEN, M., TOMESCU, C., XUE, F., WU, G., HOWELL, B. J., AI, Y., SUN,  
1222 J., AZZONI, L., LE COZ, C., ROMBERG, N. & MONTANER, L. J. 2019. BCL6  
1223 Inhibitor-Mediated Downregulation of Phosphorylated SAMHD1 and T Cell  
1224 Activation Are Associated with Decreased HIV Infection and Reactivation. *J*  
1225 *Virology*, 93.
- 1226 CAO, S., LIU, J., SONG, L. & MA, X. 2005. The protooncogene c-Maf is an essential  
1227 transcription factor for IL-10 gene expression in macrophages. *J Immunol*, 174,  
1228 3484-92.
- 1229 CHAHROUDI, A., SILVESTRI, G. & LICHTERFELD, M. 2015. T memory stem cells and  
1230 HIV: a long-term relationship. *Curr HIV/AIDS Rep*, 12, 33-40.
- 1231 CHOMONT, N., EL-FAR, M., ANCUTA, P., TRAUTMANN, L., PROCOPIO, F. A., YASSINE-  
1232 DIAB, B., BOUCHER, G., BOULASSEL, M. R., GHATTAS, G., BRECHLEY, J. M.,  
1233 SCHACKER, T. W., HILL, B. J., DOUEK, D. C., ROUTY, J. P., HADDAD, E. K. &  
1234 SEKALY, R. P. 2009. HIV reservoir size and persistence are driven by T cell  
1235 survival and homeostatic proliferation. *Nat Med*, 15, 893-900.
- 1236 CLERICI, M., WYNN, T. A., BERZOFKY, J. A., BLATT, S. P., HENDRIX, C. W., SHER, A.,  
1237 COFFMAN, R. L. & SHEARER, G. M. 1994. Role of interleukin-10 in T helper cell  
1238 dysfunction in asymptomatic individuals infected with the human  
1239 immunodeficiency virus. *J Clin Invest*, 93, 768-75.
- 1240 CLOUSE, K. A., POWELL, D., WASHINGTON, I., POLI, G., STREBEL, K., FARRAR, W.,  
1241 BARSTAD, P., KOVACS, J., FAUCI, A. S. & FOLKS, T. M. 1989. Monokine  
1242 regulation of human immunodeficiency virus-1 expression in a chronically  
1243 infected human T cell clone. *J Immunol*, 142, 431-8.
- 1244 COUPER, K. N., BLOUNT, D. G. & RILEY, E. M. 2008. IL-10: the master regulator of  
1245 immunity to infection. *J Immunol*, 180, 5771-7.
- 1246 CROTTY, S. 2014. T follicular helper cell differentiation, function, and roles in disease.  
1247 *Immunity*, 41, 529-42.
- 1248 CROTTY, S. 2019. T Follicular Helper Cell Biology: A Decade of Discovery and  
1249 Diseases. *Immunity*, 50, 1132-1148.
- 1250 CUBAS, R. A., MUDD, J. C., SAVOYE, A. L., PERREAU, M., VAN GREVENYNGHE, J.,  
1251 METCALF, T., CONNICK, E., MEDITZ, A., FREEMAN, G. J., ABESADA-TERK, G.,  
1252 JR., JACOBSON, J. M., BROOKS, A. D., CROTTY, S., ESTES, J. D., PANTALEO, G.,  
1253 LEDERMAN, M. M. & HADDAD, E. K. 2013. Inadequate T follicular cell help  
1254 impairs B cell immunity during HIV infection. *Nat Med*, 19, 494-9.

- 1255 CUMMINS, N. W., SAINSKI-NGUYEN, A. M., NATESAMPILLAI, S., ABOULNASR, F.,  
1256 KAUFMANN, S. & BADLEY, A. D. 2017. Maintenance of the HIV Reservoir Is  
1257 Antagonized by Selective BCL2 Inhibition. *J Virol*, 91.
- 1258 DECALF, J., DESDOUITS, M., RODRIGUES, V., GOBERT, F. X., GENTILI, M., MARQUES-  
1259 LADEIRA, S., CHAMONTIN, C., MOUGEL, M., CUNHA DE ALENCAR, B. &  
1260 BENAROCH, P. 2017. Sensing of HIV-1 Entry Triggers a Type I Interferon  
1261 Response in Human Primary Macrophages. *J Virol*, 91.
- 1262 DELEAGE, C., WIETGREFE, S. W., DEL PRETE, G., MORCOCK, D. R., HAO, X. P., PIATAK,  
1263 M., JR., BESS, J., ANDERSON, J. L., PERKEY, K. E., REILLY, C., MCCUNE, J. M.,  
1264 HAASE, A. T., LIFSON, J. D., SCHACKER, T. W. & ESTES, J. D. 2016. Defining HIV  
1265 and SIV Reservoirs in Lymphoid Tissues. *Pathog Immun*, 1, 68-106.
- 1266 DEMOULIN, J. B., UYTENHOVE, C., VAN ROOST, E., DELESTRE, B., DONCKERS, D.,  
1267 VAN SNICK, J. & RENAULD, J. C. 1996. A single tyrosine of the interleukin-9 (IL-  
1268 9) receptor is required for STAT activation, antiapoptotic activity, and growth  
1269 regulation by IL-9. *Mol Cell Biol*, 16, 4710-6.
- 1270 DONG, H., ZHU, G., TAMADA, K. & CHEN, L. 1999. B7-H1, a third member of the B7  
1271 family, co-stimulates T-cell proliferation and interleukin-10 secretion. *Nat*  
1272 *Med*, 5, 1365-9.
- 1273 DONNELLY, R. P., DICKENSHEETS, H. & FINBLOOM, D. S. 1999. The interleukin-10  
1274 signal transduction pathway and regulation of gene expression in  
1275 mononuclear phagocytes. *J Interferon Cytokine Res*, 19, 563-73.
- 1276 EJRNAES, M., FILIPPI, C. M., MARTINIC, M. M., LING, E. M., TOGHER, L. M., CROTTY, S.  
1277 & VON HERRATH, M. G. 2006. Resolution of a chronic viral infection after  
1278 interleukin-10 receptor blockade. *J Exp Med*, 203, 2461-72.
- 1279 ERIKSSON, S., GRAF, E. H., DAHL, V., STRAIN, M. C., YUKL, S. A., LYSENKO, E. S., BOSCH,  
1280 R. J., LAI, J., CHIOMA, S., EMAD, F., ABDEL-MOHSEN, M., HOH, R., HECHT, F.,  
1281 HUNT, P., SOMSOUK, M., WONG, J., JOHNSTON, R., SILICIANO, R. F., RICHMAN,  
1282 D. D., O'DOHERTY, U., PALMER, S., DEEKS, S. G. & SILICIANO, J. D. 2013.  
1283 Comparative analysis of measures of viral reservoirs in HIV-1 eradication  
1284 studies. *PLoS Pathog*, 9, e1003174.
- 1285 ESTES, J. D., LI, Q., REYNOLDS, M. R., WIETGREFE, S., DUAN, L., SCHACKER, T., PICKER,  
1286 L. J., WATKINS, D. I., LIFSON, J. D., REILLY, C., CARLIS, J. & HAASE, A. T. 2006.  
1287 Premature induction of an immunosuppressive regulatory T cell response  
1288 during acute simian immunodeficiency virus infection. *J Infect Dis*, 193, 703-  
1289 12.
- 1290 EVANS, V. A., VAN DER SLUIS, R. M., SOLOMON, A., DANTANARAYANA, A., MCNEIL, C.,  
1291 GARSIA, R., PALMER, S., FROMENTIN, R., CHOMONT, N., SEKALY, R. P.,  
1292 CAMERON, P. U. & LEWIN, S. R. 2018. Programmed cell death-1 contributes to  
1293 the establishment and maintenance of HIV-1 latency. *AIDS*, 32, 1491-1497.
- 1294 FOLKS, T. M., CLOUSE, K. A., JUSTEMENT, J., RABSON, A., DUH, E., KEHRL, J. H. & FAUCI,  
1295 A. S. 1989. Tumor necrosis factor alpha induces expression of human  
1296 immunodeficiency virus in a chronically infected T-cell clone. *Proc Natl Acad*  
1297 *Sci U S A*, 86, 2365-8.
- 1298 FROMENTIN, R., BAKEMAN, W., LAWANI, M. B., KHOURY, G., HARTOGENSIS, W.,  
1299 DAFONSECA, S., KILLIAN, M., EPLING, L., HOH, R., SINCLAIR, E., HECHT, F. M.,  
1300 BACCHETTI, P., DEEKS, S. G., LEWIN, S. R., SEKALY, R. P. & CHOMONT, N. 2016.



- 1301 CD4+ T Cells Expressing PD-1, TIGIT and LAG-3 Contribute to HIV Persistence  
1302 during ART. *PLoS Pathog*, 12, e1005761.
- 1303 FROMENTIN, R., DAFONSECA, S., COSTINIUK, C. T., EL-FAR, M., PROCOPIO, F. A.,  
1304 HECHT, F. M., HOH, R., DEEKS, S. G., HAZUDA, D. J., LEWIN, S. R., ROUTY, J. P.,  
1305 SEKALY, R. P. & CHOMONT, N. 2019. PD-1 blockade potentiates HIV latency  
1306 reversal ex vivo in CD4(+) T cells from ART-suppressed individuals. *Nat*  
1307 *Commun*, 10, 814.
- 1308 FUKAZAWA, Y., LUM, R., OKOYE, A. A., PARK, H., MATSUDA, K., BAE, J. Y., HAGEN, S. I.,  
1309 SHOEMAKER, R., DELEAGE, C., LUCERO, C., MORCOCK, D., SWANSON, T.,  
1310 LEGASSE, A. W., AXTHELM, M. K., HESSELGESSER, J., GELEZIUNAS, R., HIRSCH,  
1311 V. M., EDLEFSEN, P. T., PIATAK, M., JR., ESTES, J. D., LIFSON, J. D. & PICKER, L.  
1312 J. 2015. B cell follicle sanctuary permits persistent productive simian  
1313 immunodeficiency virus infection in elite controllers. *Nat Med*, 21, 132-9.
- 1314 FUSS, I. J., KANOF, M. E., SMITH, P. D. & ZOLA, H. 2009. Isolation of whole mononuclear  
1315 cells from peripheral blood and cord blood. *Curr Protoc Immunol*, Chapter 7,  
1316 Unit7 1.
- 1317 GAVEGNANO, C., BREHM, J. H., DUPUY, F. P., TALLA, A., RIBEIRO, S. P., KULPA, D. A.,  
1318 CAMERON, C., SANTOS, S., HURWITZ, S. J., MARCONI, V. C., ROUTY, J. P.,  
1319 SABBAGH, L., SCHINAZI, R. F. & SEKALY, R. P. 2017. Novel mechanisms to  
1320 inhibit HIV reservoir seeding using Jak inhibitors. *PLoS Pathog*, 13, e1006740.
- 1321 GERMAIN, R. N., ROBEY, E. A. & CAHALAN, M. D. 2012. A decade of imaging cellular  
1322 motility and interaction dynamics in the immune system. *Science*, 336, 1676-  
1323 81.
- 1324 GERNER, M. Y., KASTENMULLER, W., IFRIM, I., KABAT, J. & GERMAIN, R. N. 2012.  
1325 Histo-cytometry: a method for highly multiplex quantitative tissue imaging  
1326 analysis applied to dendritic cell subset microanatomy in lymph nodes.  
1327 *Immunity*, 37, 364-76.
- 1328 GODINHO-SANTOS, A., FOXALL, R. B., ANTAO, A. V., TAVARES, B., FERREIRA, T.,  
1329 SERRA-CAETANO, A., MATOSO, P. & SOUSA, A. E. 2020. Follicular Helper T  
1330 Cells Are Major Human Immunodeficiency Virus-2 Reservoirs and Support  
1331 Productive Infection. *J Infect Dis*, 221, 122-126.
- 1332 HERBEIN, G. 2018. The Human Cytomegalovirus, from Oncomodulation to  
1333 Oncogenesis. *Viruses*, 10.
- 1334 HERTOOGHS, N., GEIJTENBEEK, T. B. H. & RIBEIRO, C. M. S. 2017. Interplay between  
1335 HIV-1 innate sensing and restriction in mucosal dendritic cells: balancing  
1336 defense and viral transmission. *Curr Opin Virol*, 22, 112-119.
- 1337 HILLMER, E. J., ZHANG, H., LI, H. S. & WATOWICH, S. S. 2016. STAT3 signaling in  
1338 immunity. *Cytokine Growth Factor Rev*, 31, 1-15.
- 1339 HUANG, A. Y., QI, H. & GERMAIN, R. N. 2004. Illuminating the landscape of in vivo  
1340 immunity: insights from dynamic in situ imaging of secondary lymphoid  
1341 tissues. *Immunity*, 21, 331-9.
- 1342 HULTQUIST, J. F., HIATT, J., SCHUMANN, K., MCGREGOR, M. J., ROTH, T. L., HAAS, P.,  
1343 DOUDNA, J. A., MARSON, A. & KROGAN, N. J. 2019. CRISPR-Cas9 genome  
1344 engineering of primary CD4(+) T cells for the interrogation of HIV-host factor  
1345 interactions. *Nat Protoc*, 14, 1-27.

- 1346 IP, W. K. E., HOSHI, N., SHOUVAL, D. S., SNAPPER, S. & MEDZHITOV, R. 2017. Anti-  
1347 inflammatory effect of IL-10 mediated by metabolic reprogramming of  
1348 macrophages. *Science*, 356, 513-519.
- 1349 JAKOBSEN, M. R., OLAGNIER, D. & HISCOTT, J. 2015. Innate immune sensing of HIV-1  
1350 infection. *Curr Opin HIV AIDS*, 10, 96-102.
- 1351 JOCHUM, S., MOOSMANN, A., LANG, S., HAMMERSCHMIDT, W. & ZEIDLER, R. 2012.  
1352 The EBV immunoevasins vIL-10 and BNLF2a protect newly infected B cells  
1353 from immune recognition and elimination. *PLoS Pathog*, 8, e1002704.
- 1354 JONES, M., LADELL, K., WYNN, K. K., STACEY, M. A., QUIGLEY, M. F., GOSTICK, E., PRICE,  
1355 D. A. & HUMPHREYS, I. R. 2010. IL-10 restricts memory T cell inflation during  
1356 cytomegalovirus infection. *J Immunol*, 185, 3583-92.
- 1357 KACZMAREK MICHAELS, K., NATARAJAN, M., EULER, Z., ALTER, G., VIGLIANTI, G. &  
1358 HENDERSON, A. J. 2015. Blimp-1, an intrinsic factor that represses HIV-1  
1359 proviral transcription in memory CD4+ T cells. *J Immunol*, 194, 3267-74.
- 1360 KAHAN, S. M. & ZAJAC, A. J. 2019. Immune Exhaustion: Past Lessons and New Insights  
1361 from Lymphocytic Choriomeningitis Virus. *Viruses*, 11.
- 1362 KELESIDIS, T., KENDALL, M. A., YANG, O. O., HODIS, H. N. & CURRIER, J. S. 2012.  
1363 Biomarkers of microbial translocation and macrophage activation: association  
1364 with progression of subclinical atherosclerosis in HIV-1 infection. *J Infect Dis*,  
1365 206, 1558-67.
- 1366 KERFOOT, S. M., YAARI, G., PATEL, J. R., JOHNSON, K. L., GONZALEZ, D. G., KLEINSTEIN,  
1367 S. H. & HABERMAN, A. M. 2011. Germinal center B cell and T follicular helper  
1368 cell development initiates in the interfollicular zone. *Immunity*, 34, 947-60.
- 1369 KUBO, M. & MOTOMURA, Y. 2012. Transcriptional regulation of the anti-  
1370 inflammatory cytokine IL-10 in acquired immune cells. *Front Immunol*, 3, 275.
- 1371 KULPA, D. A., BREHM, J. H., FROMENTIN, R., COOPER, A., COOPER, C., AHLERS, J.,  
1372 CHOMONT, N. & SEKALY, R. P. 2013. The immunological synapse: the gateway  
1373 to the HIV reservoir. *Immunol Rev*, 254, 305-25.
- 1374 KULPA, D. A., TALLA, A., BREHM, J. H., RIBEIRO, S. P., YUAN, S., BEBIN-BLACKWELL,  
1375 A. G., MILLER, M., BARNARD, R., DEEKS, S. G., HAZUDA, D., CHOMONT, N. &  
1376 SEKALY, R. P. 2019. Differentiation into an Effector Memory Phenotype  
1377 Potentiates HIV-1 Latency Reversal in CD4(+) T Cells. *J Virol*, 93.
- 1378 L., P. 2005. Interleukin-10 Antibodies. *Schering Corporation, World Intellectual  
1379 Property Organization*, NA, NA.
- 1380 LAIDLAW, B. J., LU, Y., AMEZQUITA, R. A., WEINSTEIN, J. S., VANDER HEIDEN, J. A.,  
1381 GUPTA, N. T., KLEINSTEIN, S. H., KAECH, S. M. & CRAFT, J. 2017. Interleukin-  
1382 10 from CD4(+) follicular regulatory T cells promotes the germinal center  
1383 response. *Sci Immunol*, 2.
- 1384 LANDAY, A. L., CLERICI, M., HASHEMI, F., KESSLER, H., BERZOFSKY, J. A. & SHEARER,  
1385 G. M. 1996. In vitro restoration of T cell immune function in human  
1386 immunodeficiency virus-positive persons: effects of interleukin (IL)-12 and  
1387 anti-IL-10. *J Infect Dis*, 173, 1085-91.
- 1388 LEE, G. Q. & LICHTERFELD, M. 2016. Diversity of HIV-1 reservoirs in CD4+ T-cell  
1389 subpopulations. *Curr Opin HIV AIDS*, 11, 383-7.

- 1390 LEVY, Y. & BROUET, J. C. 1994. Interleukin-10 prevents spontaneous death of  
1391 germinal center B cells by induction of the bcl-2 protein. *J Clin Invest*, 93, 424-  
1392 8.
- 1393 LINDQVIST, M., VAN LUNZEN, J., SOGHOIAN, D. Z., KUHL, B. D., RANASINGHE, S.,  
1394 KRANIAS, G., FLANDERS, M. D., CUTLER, S., YUDANIN, N., MULLER, M. I., DAVIS,  
1395 I., FARBER, D., HARTJEN, P., HAAG, F., ALTER, G., SCHULZE ZUR WIESCH, J. &  
1396 STREECK, H. 2012. Expansion of HIV-specific T follicular helper cells in chronic  
1397 HIV infection. *J Clin Invest*, 122, 3271-80.
- 1398 LIU, B. S., CAO, Y., HUIZINGA, T. W., HAFLE, D. A. & TOES, R. E. 2014. TLR-mediated  
1399 STAT3 and ERK activation controls IL-10 secretion by human B cells. *Eur J*  
1400 *Immunol*, 44, 2121-9.
- 1401 LIU, R., SIMONETTI, F. R. & HO, Y. C. 2020. The forces driving clonal expansion of the  
1402 HIV-1 latent reservoir. *Virol J*, 17, 4.
- 1403 MACEIRAS, A. R., ALMEIDA, S. C. P., MARIOTTI-FERRANDIZ, E., CHAARA, W.,  
1404 JEBBARI, F., SIX, A., HORI, S., KLATZMANN, D., FARO, J. & GRACA, L. 2017. T  
1405 follicular helper and T follicular regulatory cells have different TCR specificity.  
1406 *Nat Commun*, 8, 15067.
- 1407 MARCHETTI, G., TINCATI, C. & SILVESTRI, G. 2013. Microbial translocation in the  
1408 pathogenesis of HIV infection and AIDS. *Clin Microbiol Rev*, 26, 2-18.
- 1409 MCGARY, C. S., DELEAGE, C., HARPER, J., MICCI, L., RIBEIRO, S. P., PAGANINI, S., KURI-  
1410 CERVANTES, L., BENNE, C., RYAN, E. S., BALDERAS, R., JEAN, S., EASLEY, K.,  
1411 MARCONI, V., SILVESTRI, G., ESTES, J. D., SEKALY, R. P. & PAIARDINI, M. 2017.  
1412 CTLA-4(+)/PD-1(-) Memory CD4(+) T Cells Critically Contribute to Viral  
1413 Persistence in Antiretroviral Therapy-Suppressed, SIV-Infected Rhesus  
1414 Macaques. *Immunity*, 47, 776-788 e5.
- 1415 MCMICHAEL, A. J., BORROW, P., TOMARAS, G. D., GOONETILLEKE, N. & HAYNES, B. F.  
1416 2010. The immune response during acute HIV-1 infection: clues for vaccine  
1417 development. *Nat Rev Immunol*, 10, 11-23.
- 1418 MITTAL, S. K. & ROCHE, P. A. 2015. Suppression of antigen presentation by IL-10. *Curr*  
1419 *Opin Immunol*, 34, 22-7.
- 1420 MUMM, J. B. & OFT, M. 2013. Pegylated IL-10 induces cancer immunity: the surprising  
1421 role of IL-10 as a potent inducer of IFN-gamma-mediated CD8(+) T cell  
1422 cytotoxicity. *Bioessays*, 35, 623-31.
- 1423 MURRAY, A. J., KWON, K. J., FARBER, D. L. & SILICIANO, R. F. 2016. The Latent  
1424 Reservoir for HIV-1: How Immunologic Memory and Clonal Expansion  
1425 Contribute to HIV-1 Persistence. *J Immunol*, 197, 407-17.
- 1426 NAING, A., INFANTE, J. R., PAPADOPOULOS, K. P., CHAN, I. H., SHEN, C., RATTI, N. P.,  
1427 ROJO, B., AUTIO, K. A., WONG, D. J., PATEL, M. R., OTT, P. A., FALCHOOK, G. S.,  
1428 PANT, S., HUNG, A., PEKAREK, K. L., WU, V., ADAMOW, M., MCCAULEY, S.,  
1429 MUMM, J. B., WONG, P., VAN VLASSELAER, P., LEVEQUE, J., TANNIR, N. M. &  
1430 OFT, M. 2018. PEGylated IL-10 (Pegilodecakin) Induces Systemic Immune  
1431 Activation, CD8(+) T Cell Invigoration and Polyclonal T Cell Expansion in  
1432 Cancer Patients. *Cancer Cell*, 34, 775-791 e3.
- 1433 NIEMAND, C., NIMMESGER, A., HAAN, S., FISCHER, P., SCHAPER, F., ROSSAINT, R.,  
1434 HEINRICH, P. C. & MULLER-NEUEN, G. 2003. Activation of STAT3 by IL-6 and



- 1435 IL-10 in primary human macrophages is differentially modulated by  
1436 suppressor of cytokine signaling 3. *J Immunol*, 170, 3263-72.
- 1437 PENG, G., LI, S., WU, W., TAN, X., CHEN, Y. & CHEN, Z. 2008. PD-1 upregulation is  
1438 associated with HBV-specific T cell dysfunction in chronic hepatitis B patients.  
1439 *Mol Immunol*, 45, 963-70.
- 1440 PERREAU, M., SAVOYE, A. L., DE CRIGNIS, E., CORPATAUX, J. M., CUBAS, R., HADDAD,  
1441 E. K., DE LEVAL, L., GRAZIOSI, C. & PANTALEO, G. 2013. Follicular helper T cells  
1442 serve as the major CD4 T cell compartment for HIV-1 infection, replication, and  
1443 production. *J Exp Med*, 210, 143-56.
- 1444 PERSAUD, D., PIERSON, T., RUFF, C., FINZI, D., CHADWICK, K. R., MARGOLICK, J. B.,  
1445 RUFF, A., HUTTON, N., RAY, S. & SILICIANO, R. F. 2000. A stable latent reservoir  
1446 for HIV-1 in resting CD4(+) T lymphocytes in infected children. *J Clin Invest*,  
1447 105, 995-1003.
- 1448 PETROVAS, C., FERRANDO-MARTINEZ, S., GERNER, M. Y., CASAZZA, J. P., PEGU, A.,  
1449 DELEAGE, C., COOPER, A., HATAYE, J., ANDREWS, S., AMBROZAK, D., DEL RIO  
1450 ESTRADA, P. M., BORITZ, E., PARIS, R., MOYSI, E., BOSWELL, K. L., RUIZ-  
1451 MATEOS, E., VAGIOS, I., LEAL, M., ABLANEDO-TERRAZAS, Y., RIVERO, A.,  
1452 GONZALEZ-HERNANDEZ, L. A., MCDERMOTT, A. B., MOIR, S., REYES-TERAN,  
1453 G., DOCOBO, F., PANTALEO, G., DOUEK, D. C., BETTS, M. R., ESTES, J. D.,  
1454 GERMAIN, R. N., MASCOLA, J. R. & KOUP, R. A. 2017. Follicular CD8 T cells  
1455 accumulate in HIV infection and can kill infected cells in vitro via bispecific  
1456 antibodies. *Sci Transl Med*, 9.
- 1457 PITT, J. M., STAVROPOULOS, E., REDFORD, P. S., BEEBE, A. M., BANCROFT, G. J.,  
1458 YOUNG, D. B. & O'GARRA, A. 2012. Blockade of IL-10 signaling during bacillus  
1459 Calmette-Guerin vaccination enhances and sustains Th1, Th17, and innate  
1460 lymphoid IFN-gamma and IL-17 responses and increases protection to  
1461 *Mycobacterium tuberculosis* infection. *J Immunol*, 189, 4079-87.
- 1462 PORICHIS, F. & KAUFMANN, D. E. 2012. Role of PD-1 in HIV pathogenesis and as target  
1463 for therapy. *Curr HIV/AIDS Rep*, 9, 81-90.
- 1464 RIGOPOULOU, E. I., ABBOTT, W. G., HAIGH, P. & NAOUMOV, N. V. 2005. Blocking of  
1465 interleukin-10 receptor--a novel approach to stimulate T-helper cell type 1  
1466 responses to hepatitis C virus. *Clin Immunol*, 117, 57-64.
- 1467 ROJAS, J. M., AVIA, M., MARTIN, V. & SEVILLA, N. 2017. IL-10: A Multifunctional  
1468 Cytokine in Viral Infections. *J Immunol Res*, 2017, 6104054.
- 1469 SAEIDI, A., ZANDI, K., CHEOK, Y. Y., SAEIDI, H., WONG, W. F., LEE, C. Y. Q., CHEONG, H.  
1470 C., YONG, Y. K., LARSSON, M. & SHANKAR, E. M. 2018. T-Cell Exhaustion in  
1471 Chronic Infections: Reversing the State of Exhaustion and Reinvigorating  
1472 Optimal Protective Immune Responses. *Front Immunol*, 9, 2569.
- 1473 SAEMANN, M. D., BOHMIG, G. A., OSTERREICHER, C. H., BURTSCHER, H., PAROLINI,  
1474 O., DIAKOS, C., STOCKL, J., HORL, W. H. & ZLABINGER, G. J. 2000. Anti-  
1475 inflammatory effects of sodium butyrate on human monocytes: potent  
1476 inhibition of IL-12 and up-regulation of IL-10 production. *FASEB J*, 14, 2380-2.
- 1477 SAID, E. A., DUPUY, F. P., TRAUTMANN, L., ZHANG, Y., SHI, Y., EL-FAR, M., HILL, B. J.,  
1478 NOTO, A., ANCUTA, P., PERETZ, Y., FONSECA, S. G., VAN GREVENYNGHE, J.,  
1479 BOULASSEL, M. R., BRUNEAU, J., SHOUKRY, N. H., ROUTY, J. P., DOUEK, D. C.,  
1480 HADDAD, E. K. & SEKALY, R. P. 2010. Programmed death-1-induced

- 1481 interleukin-10 production by monocytes impairs CD4+ T cell activation during  
1482 HIV infection. *Nat Med*, 16, 452-9.
- 1483 SAWANT, D. V., YANO, H., CHIKINA, M., ZHANG, Q., LIAO, M., LIU, C., CALLAHAN, D. J.,  
1484 SUN, Z., SUN, T., TABIB, T., PENNATHUR, A., CORRY, D. B., LUKETICH, J. D.,  
1485 LAFYATIS, R., CHEN, W., POHOLEK, A. C., BRUNO, T. C., WORKMAN, C. J. &  
1486 VIGNALI, D. A. A. 2019. Adaptive plasticity of IL-10(+) and IL-35(+) Treg cells  
1487 cooperatively promotes tumor T cell exhaustion. *Nat Immunol*, 20, 724-735.
- 1488 SCHIRALLI LESTER, G. M. & HENDERSON, A. J. 2012. Mechanisms of HIV  
1489 Transcriptional Regulation and Their Contribution to Latency. *Mol Biol Int*,  
1490 2012, 614120.
- 1491 SELTON, R. K., TONKONOGY, S., SCHULTZ, M., DIELEMAN, L. A., GRENTHER, W.,  
1492 BALISH, E., RENNICK, D. M. & SARTOR, R. B. 1998. Resident enteric bacteria  
1493 are necessary for development of spontaneous colitis and immune system  
1494 activation in interleukin-10-deficient mice. *Infect Immun*, 66, 5224-31.
- 1495 SHIVE, C. L., JIANG, W., ANTHONY, D. D. & LEDERMAN, M. M. 2015. Soluble CD14 is a  
1496 nonspecific marker of monocyte activation. *AIDS*, 29, 1263-5.
- 1497 SILVER, J. S. & HUNTER, C. A. 2008. With a little help from their friends: interleukin-  
1498 21, T cells, and B cells. *Immunity*, 29, 7-9.
- 1499 SLOBEDMAN, B., BARRY, P. A., SPENCER, J. V., AVDIC, S. & ABENDROTH, A. 2009.  
1500 Virus-encoded homologs of cellular interleukin-10 and their control of host  
1501 immune function. *J Virol*, 83, 9618-29.
- 1502 SOMSOUK, M., ESTES, J. D., DELEAGE, C., DUNHAM, R. M., ALBRIGHT, R., INADOMI, J.  
1503 M., MARTIN, J. N., DEEKS, S. G., MCCUNE, J. M. & HUNT, P. W. 2015. Gut  
1504 epithelial barrier and systemic inflammation during chronic HIV infection.  
1505 *AIDS*, 29, 43-51.
- 1506 SUBRAMANIAN, A., TAMAYO, P., MOOTHA, V. K., MUKHERJEE, S., EBERT, B. L.,  
1507 GILLETTE, M. A., PAULOVICH, A., POMEROY, S. L., GOLUB, T. R., LANDER, E. S.  
1508 & MESIROV, J. P. 2005. Gene set enrichment analysis: a knowledge-based  
1509 approach for interpreting genome-wide expression profiles. *Proc Natl Acad Sci*  
1510 *USA*, 102, 15545-50.
- 1511 SUN, R., KU, J., JAYAKAR, H., KUO, J. C., BRAMBILLA, D., HERMAN, S., ROSENSTRAUS,  
1512 M. & SPADORO, J. 1998. Ultrasensitive reverse transcription-PCR assay for  
1513 quantitation of human immunodeficiency virus type 1 RNA in plasma. *J Clin*  
1514 *Microbiol*, 36, 2964-9.
- 1515 TANG, B., BECANOVIC, K., DESPLATS, P. A., SPENCER, B., HILL, A. M., CONNOLLY, C.,  
1516 MASLIAH, E., LEAVITT, B. R. & THOMAS, E. A. 2012. Forkhead box protein p1  
1517 is a transcriptional repressor of immune signaling in the CNS: implications for  
1518 transcriptional dysregulation in Huntington disease. *Hum Mol Genet*, 21, 3097-  
1519 111.
- 1520 TAYLOR, A., AKDIS, M., JOSS, A., AKKOC, T., WENIG, R., COLONNA, M., DAIGLE, I.,  
1521 FLORY, E., BLASER, K. & AKDIS, C. A. 2007. IL-10 inhibits CD28 and ICOS  
1522 costimulations of T cells via src homology 2 domain-containing protein  
1523 tyrosine phosphatase 1. *J Allergy Clin Immunol*, 120, 76-83.
- 1524 THACKER, T. C., ZHOU, X., ESTES, J. D., JIANG, Y., KEELE, B. F., ELTON, T. S. & BURTON,  
1525 G. F. 2009. Follicular dendritic cells and human immunodeficiency virus type  
1526 1 transcription in CD4+ T cells. *J Virol*, 83, 150-8.

- 1527 TIAN, Y., MOLLO, S. B., HARRINGTON, L. E. & ZAJAC, A. J. 2016. IL-10 Regulates  
1528 Memory T Cell Development and the Balance between Th1 and Follicular Th  
1529 Cell Responses during an Acute Viral Infection. *J Immunol*, 197, 1308-21.
- 1530 TODARO, M., ZERILLI, M., RICCI-VITIANI, L., BINI, M., PEREZ ALEA, M., MARIA  
1531 FLORENA, A., MICELI, L., CONDORELLI, G., BONVENTRE, S., DI GESU, G., DE  
1532 MARIA, R. & STASSI, G. 2006. Autocrine production of interleukin-4 and  
1533 interleukin-10 is required for survival and growth of thyroid cancer cells.  
1534 *Cancer Res*, 66, 1491-9.
- 1535 TRAUTMANN, L., JANBAZIAN, L., CHOMONT, N., SAID, E. A., GIMMIG, S., BESSETTE, B.,  
1536 BOULASSEL, M. R., DELWART, E., SEPULVEDA, H., BALDERAS, R. S., ROUTY, J.  
1537 P., HADDAD, E. K. & SEKALY, R. P. 2006. Upregulation of PD-1 expression on  
1538 HIV-specific CD8+ T cells leads to reversible immune dysfunction. *Nat Med*, 12,  
1539 1198-202.
- 1540 TSUJI-TAKAYAMA, K., SUZUKI, M., YAMAMOTO, M., HARASHIMA, A., OKOCHI, A.,  
1541 OTANI, T., INOUE, T., SUGIMOTO, A., TORAYA, T., TAKEUCHI, M., YAMASAKI,  
1542 F., NAKAMURA, S. & KIBATA, M. 2008. The production of IL-10 by human  
1543 regulatory T cells is enhanced by IL-2 through a STAT5-responsive intronic  
1544 enhancer in the IL-10 locus. *J Immunol*, 181, 3897-905.
- 1545 TURNIS, M. E., ANDREWS, L. P. & VIGNALI, D. A. 2015. Inhibitory receptors as targets  
1546 for cancer immunotherapy. *Eur J Immunol*, 45, 1892-905.
- 1547 TZENG, H. T., TSAI, H. F., LIAO, H. J., LIN, Y. J., CHEN, L., CHEN, P. J. & HSU, P. N. 2012.  
1548 PD-1 blockage reverses immune dysfunction and hepatitis B viral persistence  
1549 in a mouse animal model. *PLoS One*, 7, e39179.
- 1550 VANDERGEETEN, C., FROMENTIN, R., MERLINI, E., LAWANI, M. B., DAFONSECA, S.,  
1551 BAKEMAN, W., MCNULTY, A., RAMGOPAL, M., MICHAEL, N., KIM, J. H.,  
1552 ANANWORANICH, J. & CHOMONT, N. 2014. Cross-clade ultrasensitive PCR-  
1553 based assays to measure HIV persistence in large-cohort studies. *J Virol*, 88,  
1554 12385-96.
- 1555 VIRGILIO, M. C. & COLLINS, K. L. 2020. The Impact of Cellular Proliferation on the HIV-  
1556 1 Reservoir. *Viruses*, 12.
- 1557 VOLLBRECHT, T., BRACKMANN, H., HENRICH, N., ROELING, J., SEYBOLD, U., BOGNER,  
1558 J. R., GOEBEL, F. D. & DRAENERT, R. 2010. Impact of changes in antigen level  
1559 on CD38/PD-1 co-expression on HIV-specific CD8 T cells in chronic, untreated  
1560 HIV-1 infection. *J Med Virol*, 82, 358-70.
- 1561 WANG, R., DILLON, C. P., SHI, L. Z., MILASTA, S., CARTER, R., FINKELSTEIN, D.,  
1562 MCCORMICK, L. L., FITZGERALD, P., CHI, H., MUNGER, J. & GREEN, D. R. 2011.  
1563 The transcription factor Myc controls metabolic reprogramming upon T  
1564 lymphocyte activation. *Immunity*, 35, 871-82.
- 1565 WEBER-NORDT, R. M., HENSCHLER, R., SCHOTT, E., WEHINGER, J., BEHRINGER, D.,  
1566 MERTELSMANN, R. & FINKE, J. 1996. Interleukin-10 increases Bcl-2  
1567 expression and survival in primary human CD34+ hematopoietic progenitor  
1568 cells. *Blood*, 88, 2549-58.
- 1569 WILSON, E. B. & BROOKS, D. G. 2011. The role of IL-10 in regulating immunity to  
1570 persistent viral infections. *Curr Top Microbiol Immunol*, 350, 39-65.
- 1571 WONDERLICH, E. R., SUBRAMANIAN, K., COX, B., WIEGAND, A., LACKMAN-SMITH, C.,  
1572 BALE, M. J., STONE, M., HOH, R., KEARNEY, M. F., MALDARELLI, F., DEEKS, S. G.,

- 1573 BUSCH, M. P., PTAK, R. G. & KULPA, D. A. 2019. Effector memory differentiation  
1574 increases detection of replication-competent HIV-1 in resting CD4+ T cells  
1575 from virally suppressed individuals. *PLoS Pathog*, 15, e1008074.
- 1576 YANAGAWA, Y. & ONOE, K. 2007. Enhanced IL-10 production by TLR4- and TLR2-  
1577 primed dendritic cells upon TLR restimulation. *J Immunol*, 178, 6173-80.
- 1578 YANG, O. O. 2009. Assessing the antiviral activity of HIV-1-specific cytotoxic T  
1579 lymphocytes. *Methods Mol Biol*, 485, 407-15.
- 1580 ZEVIN, A. S., MCKINNON, L., BURGNER, A. & KLATT, N. R. 2016. Microbial  
1581 translocation and microbiome dysbiosis in HIV-associated immune activation.  
1582 *Curr Opin HIV AIDS*, 11, 182-90.
- 1583 ZHANG, H. & KUCHROO, V. 2019. Epigenetic and transcriptional mechanisms for the  
1584 regulation of IL-10. *Semin Immunol*, 44, 101324.
- 1585 ZHOU, J. H., BROUSSARD, S. R., STRLE, K., FREUND, G. G., JOHNSON, R. W., DANTZER,  
1586 R. & KELLEY, K. W. 2001. IL-10 inhibits apoptosis of promyeloid cells by  
1587 activating insulin receptor substrate-2 and phosphatidylinositol 3'-kinase. *J*  
1588 *Immunol*, 167, 4436-42.  
1589

**Fig 1**

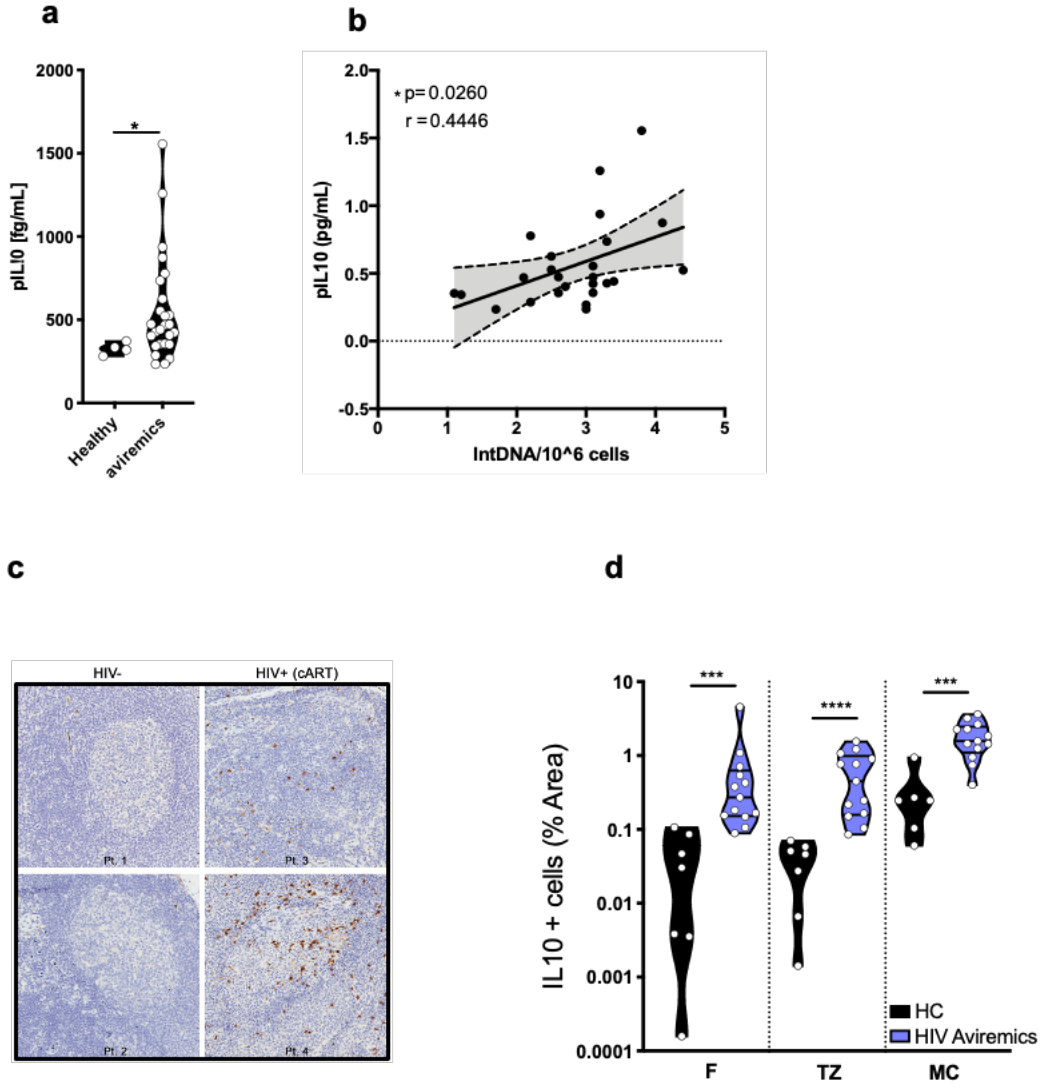



e

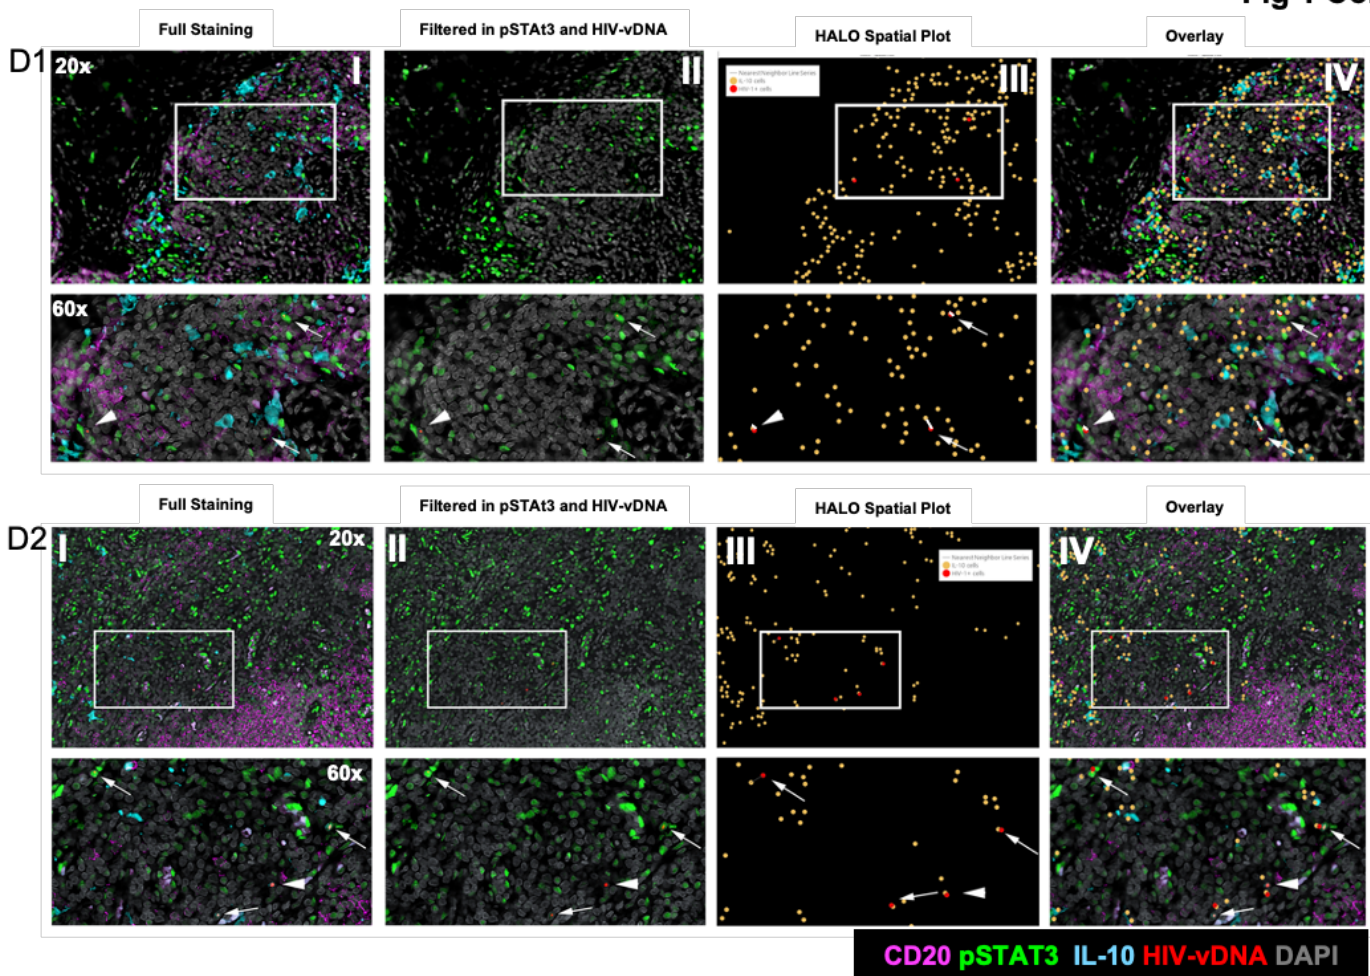

f

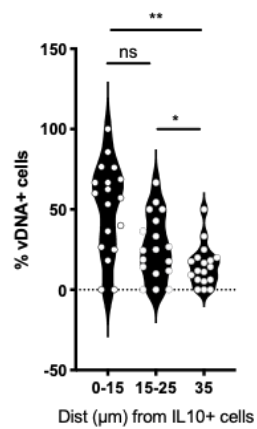

a

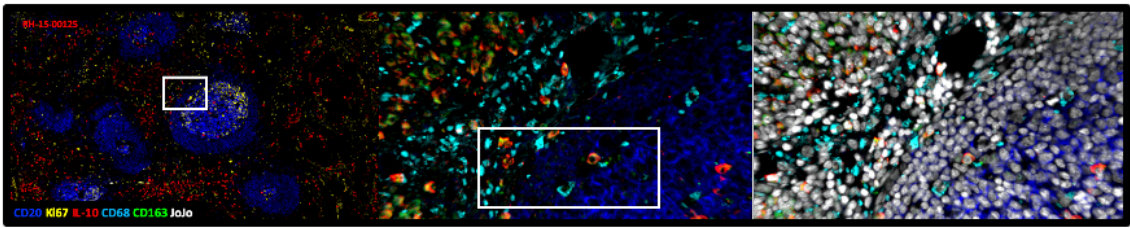

b

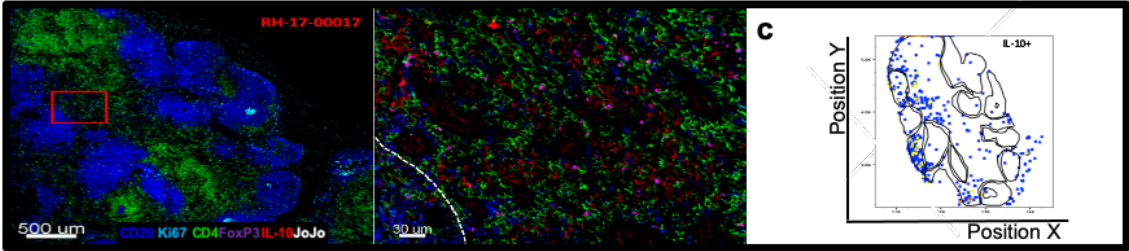

d

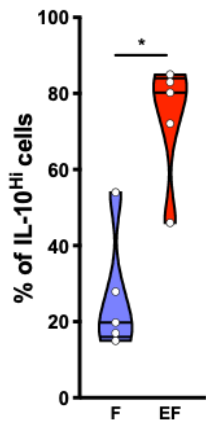

e

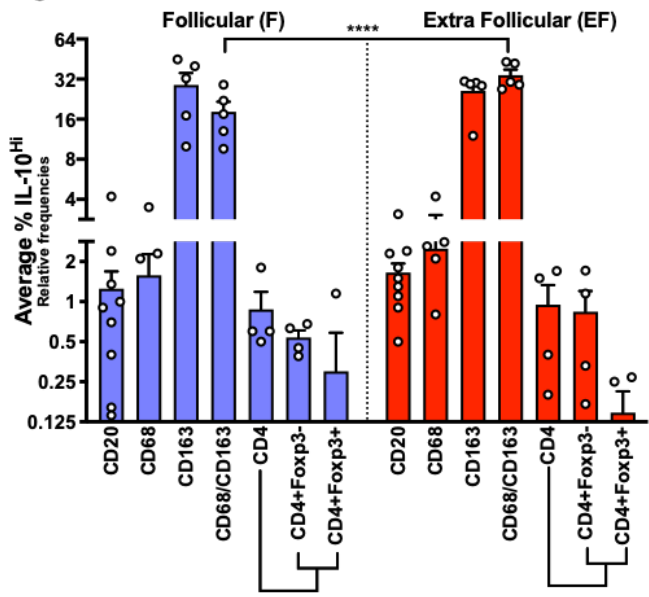

f

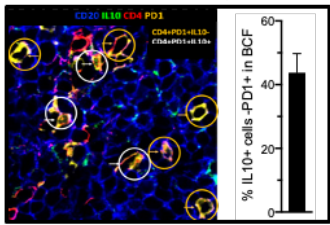

g

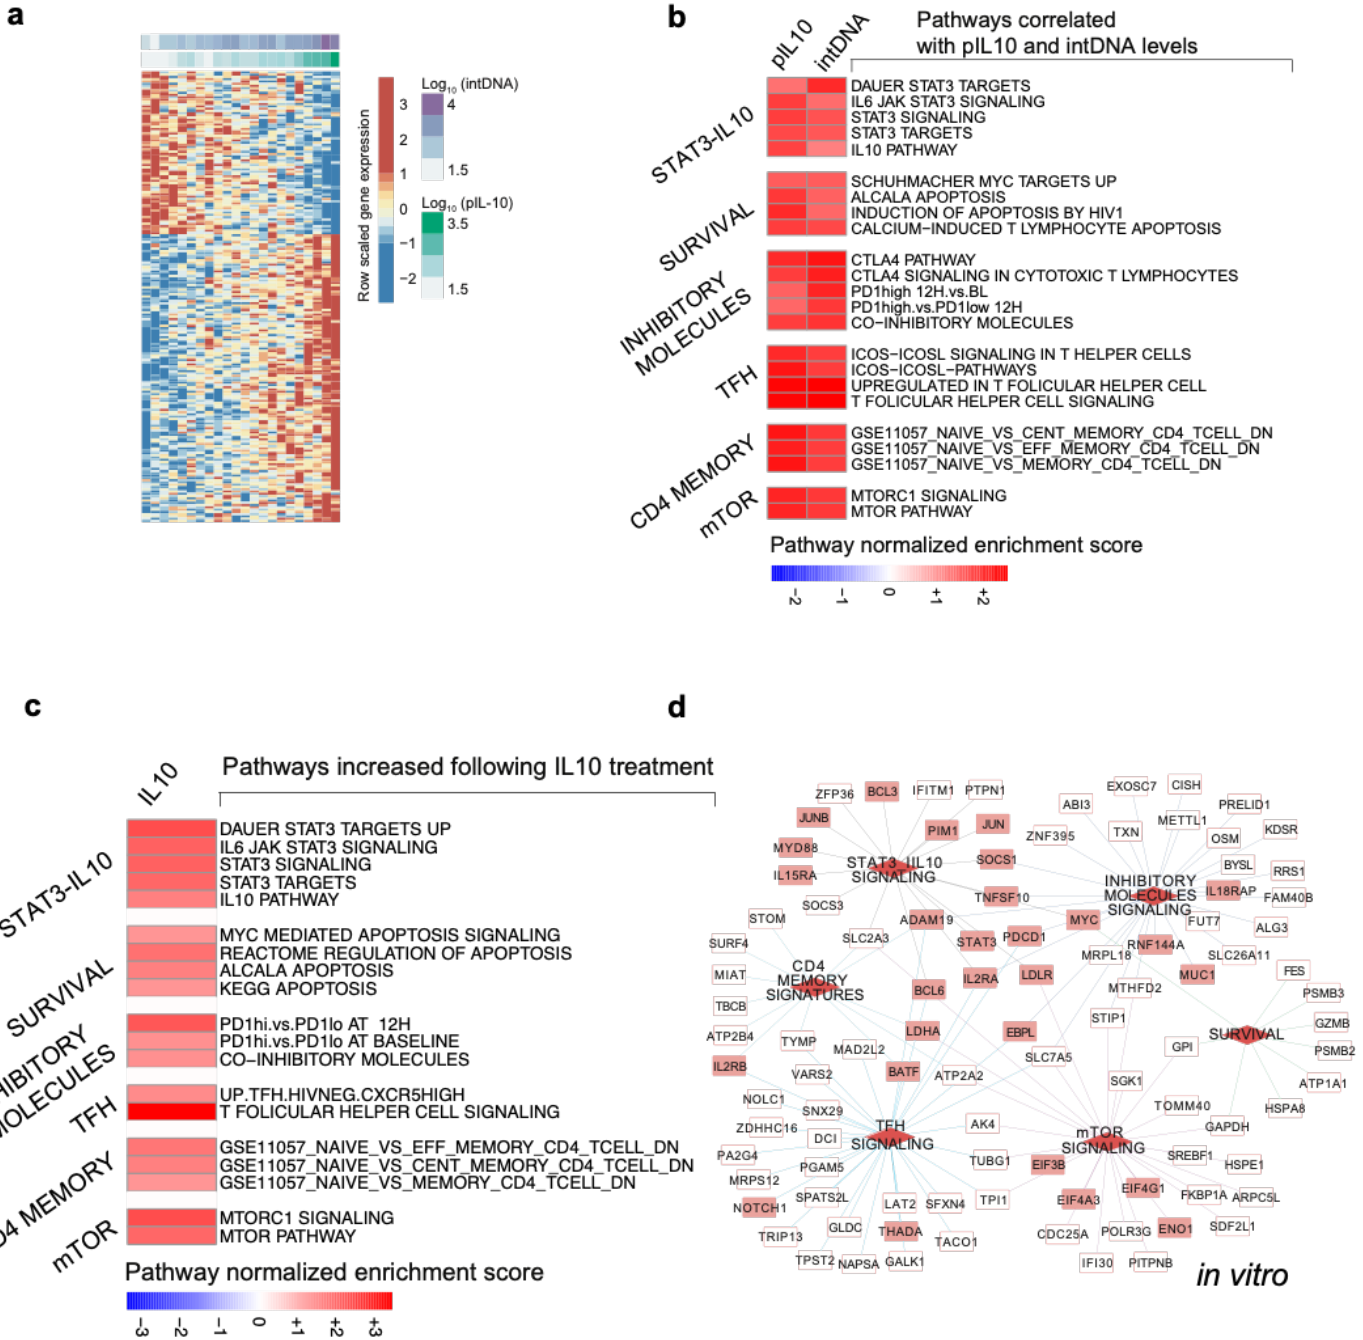



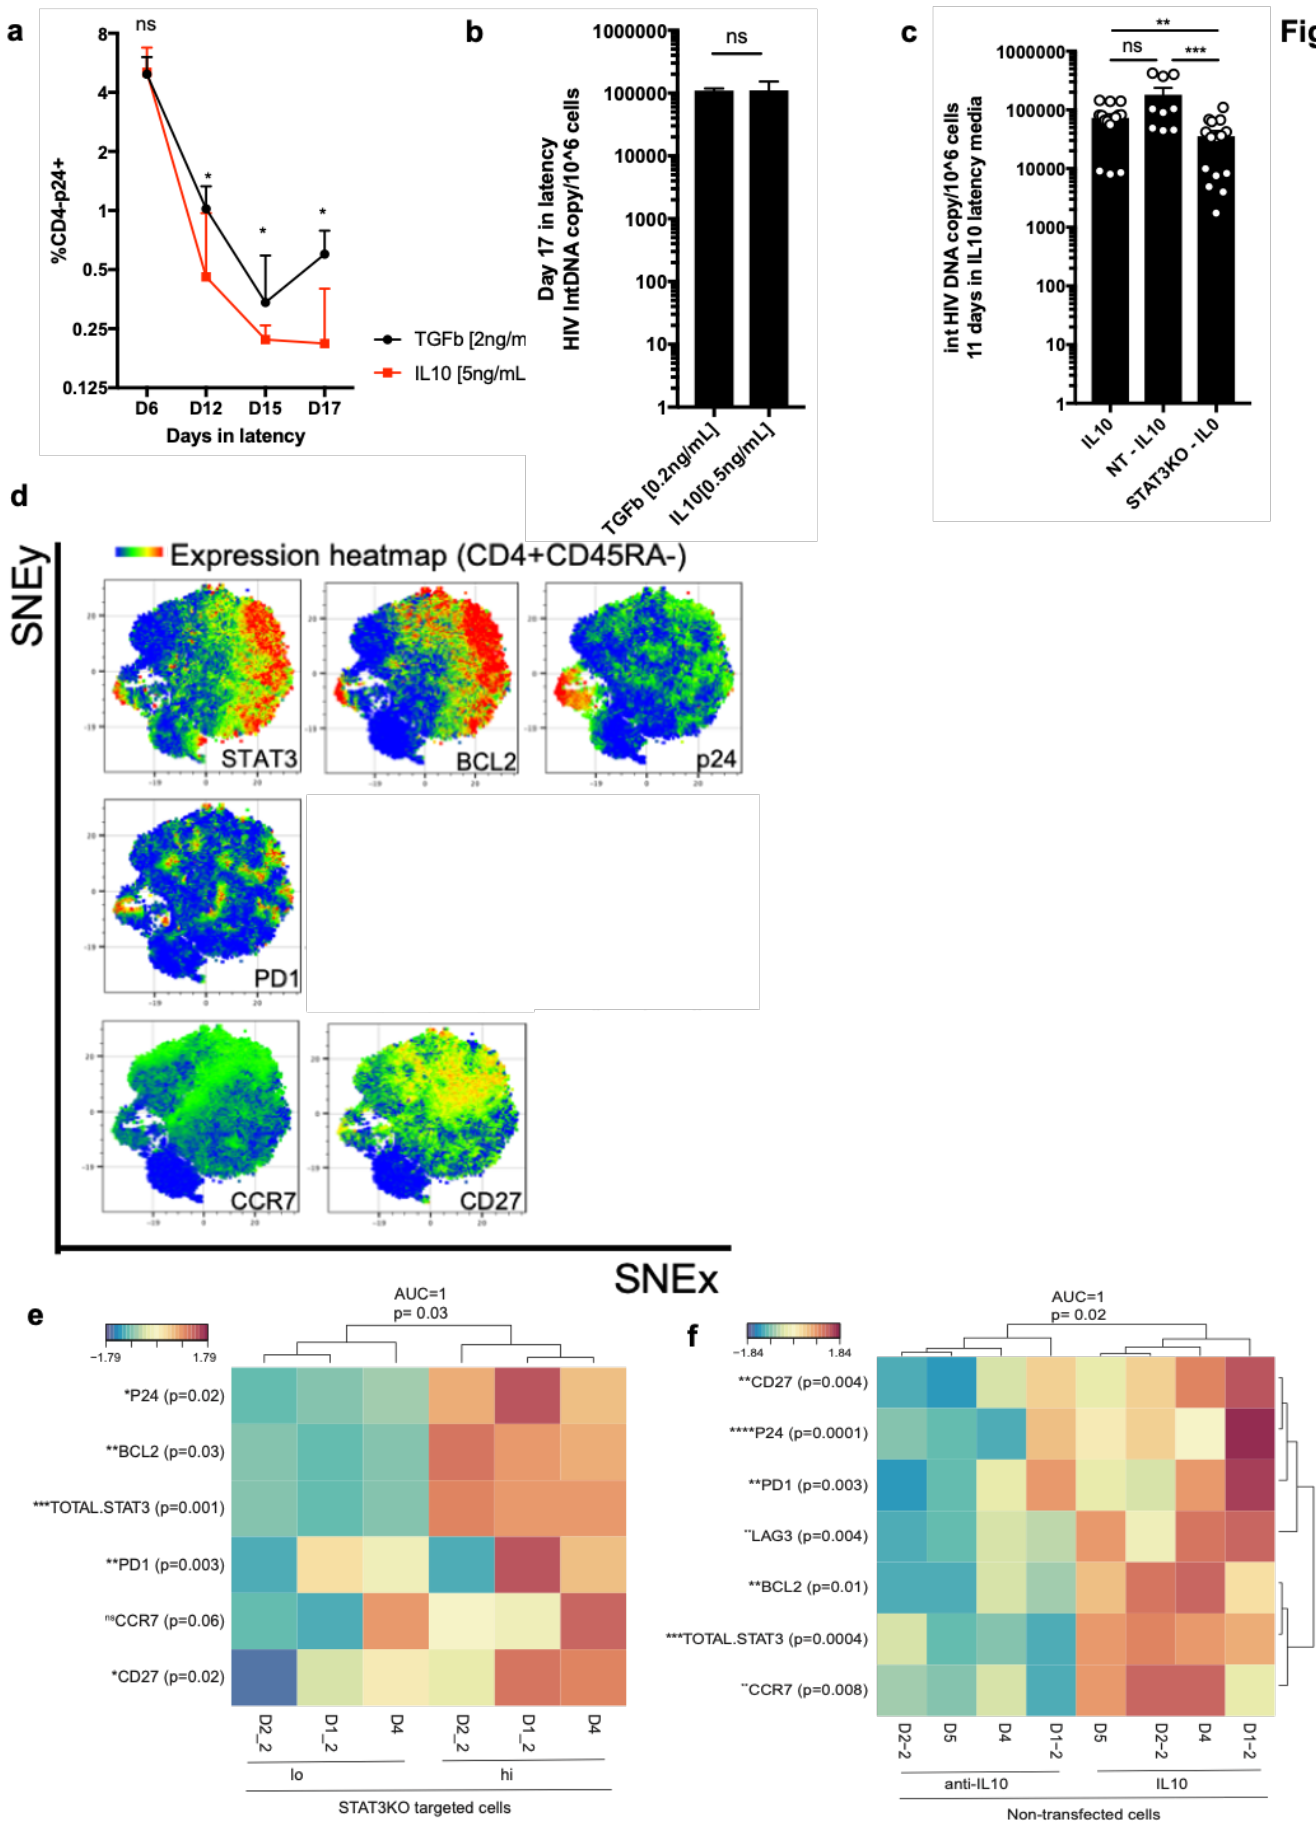

g

SNEY

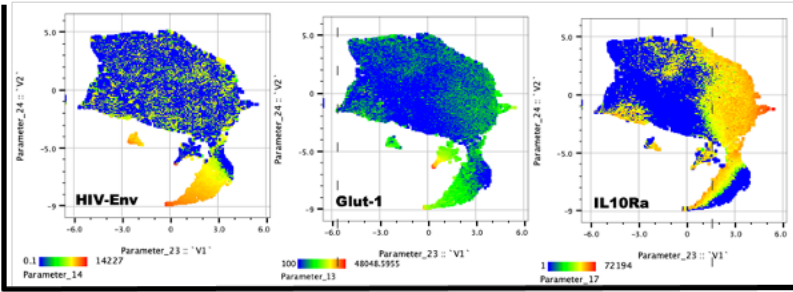

SNEx

h

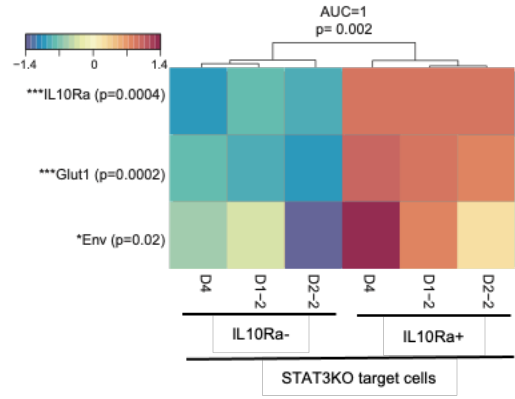

**a**

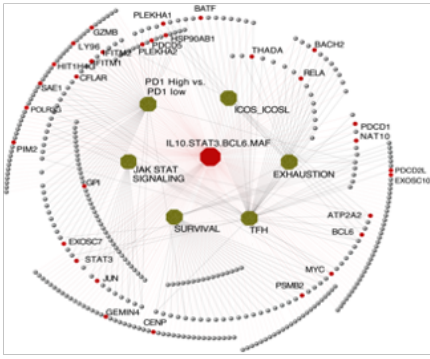

**b**

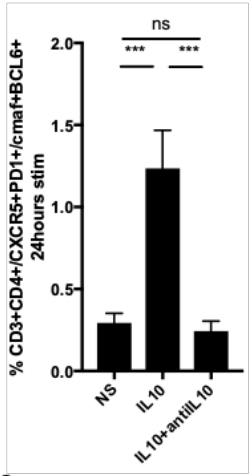

**c**

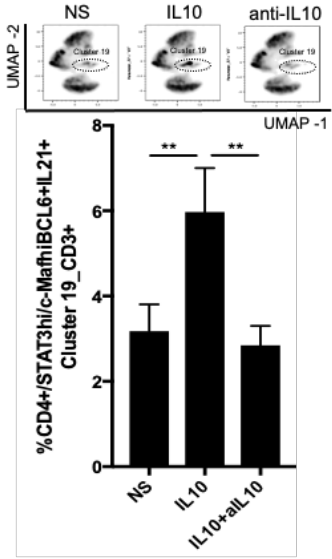

**d**

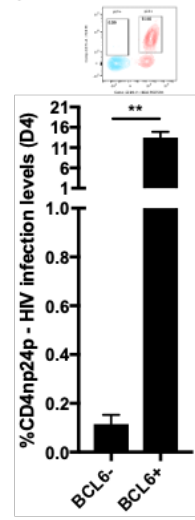

**e**

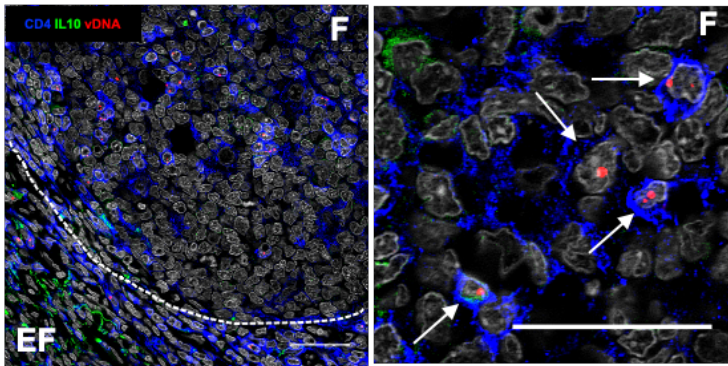

Source: https://biorxiv.org/content/10.1101/2021.02.26.432955v1.full.pdf
